# Supplementary material for: Instantaneous tiltmeter triggered by dynamic wetting behavior
Source: Research Square preprint supplement (doi:10.21203/rs.3.rs-4520905/v1), 2024-06-14
Supplement: Supplementary file 1 [file bfde392fd78e659acfb02b11.docx]

Supplementary Information for

**Instantaneous tiltmeter triggered by dynamic wetting behavior**

Fei Zhan1#, Nan Li2#, Lei Wang1*, Shuizhong Wang1, Jing Liu2, Guoyong Song1*

* E-mail address: leiwangns@bjfu.edu.cn; songg@bjfu.edu.cn

1. Materials

1.1 Preparation of Ga-Based Liquid Alloy

Ga (99.99%, Shanxi Zhaofeng Gallium Industry, China), In (99.995%, Zhuzhou Smelting Group Co., Ltd., China), and Sn (99.99%, ZhongNuo Advanced Material Technology Co., Ltd.) were weighed according to the predefined weight ratios (75.5:24.5). They were then heated together in a beaker in a vacuum oven at 200 °C for 10 h to obtain homogeneous GaIn24.5.

1.2 Preparation of LMT

Nature wheat spikes were harvested from the natural environment, and a segment of the larger root structure of wheat awns (1, 2, 3, 4 cm) was selected. PDMS was mixed with the curing agent in a 10:1 ratio, ensuring thorough stirring to eliminate air bubbles through vacuuming. The wheat awn was then placed into the PDMS and heated at 65 oC for 3 h. After complete solidification of the PDMS, the wheat awn was extracted, yielding a microchannel with sidewalls featuring anisotropic structures resembling micro-cones. Subsequently, liquid metal was introduced into the microchannel at controlled rates (0.004, 0.008, 0.012, 0.016 cm3/s). The microchannel ends were sealed with conductive silver paste, ensuring connection to wires. The assembly was cured at 65 oC for 1 h until the conductive silver paste was fully solidified.


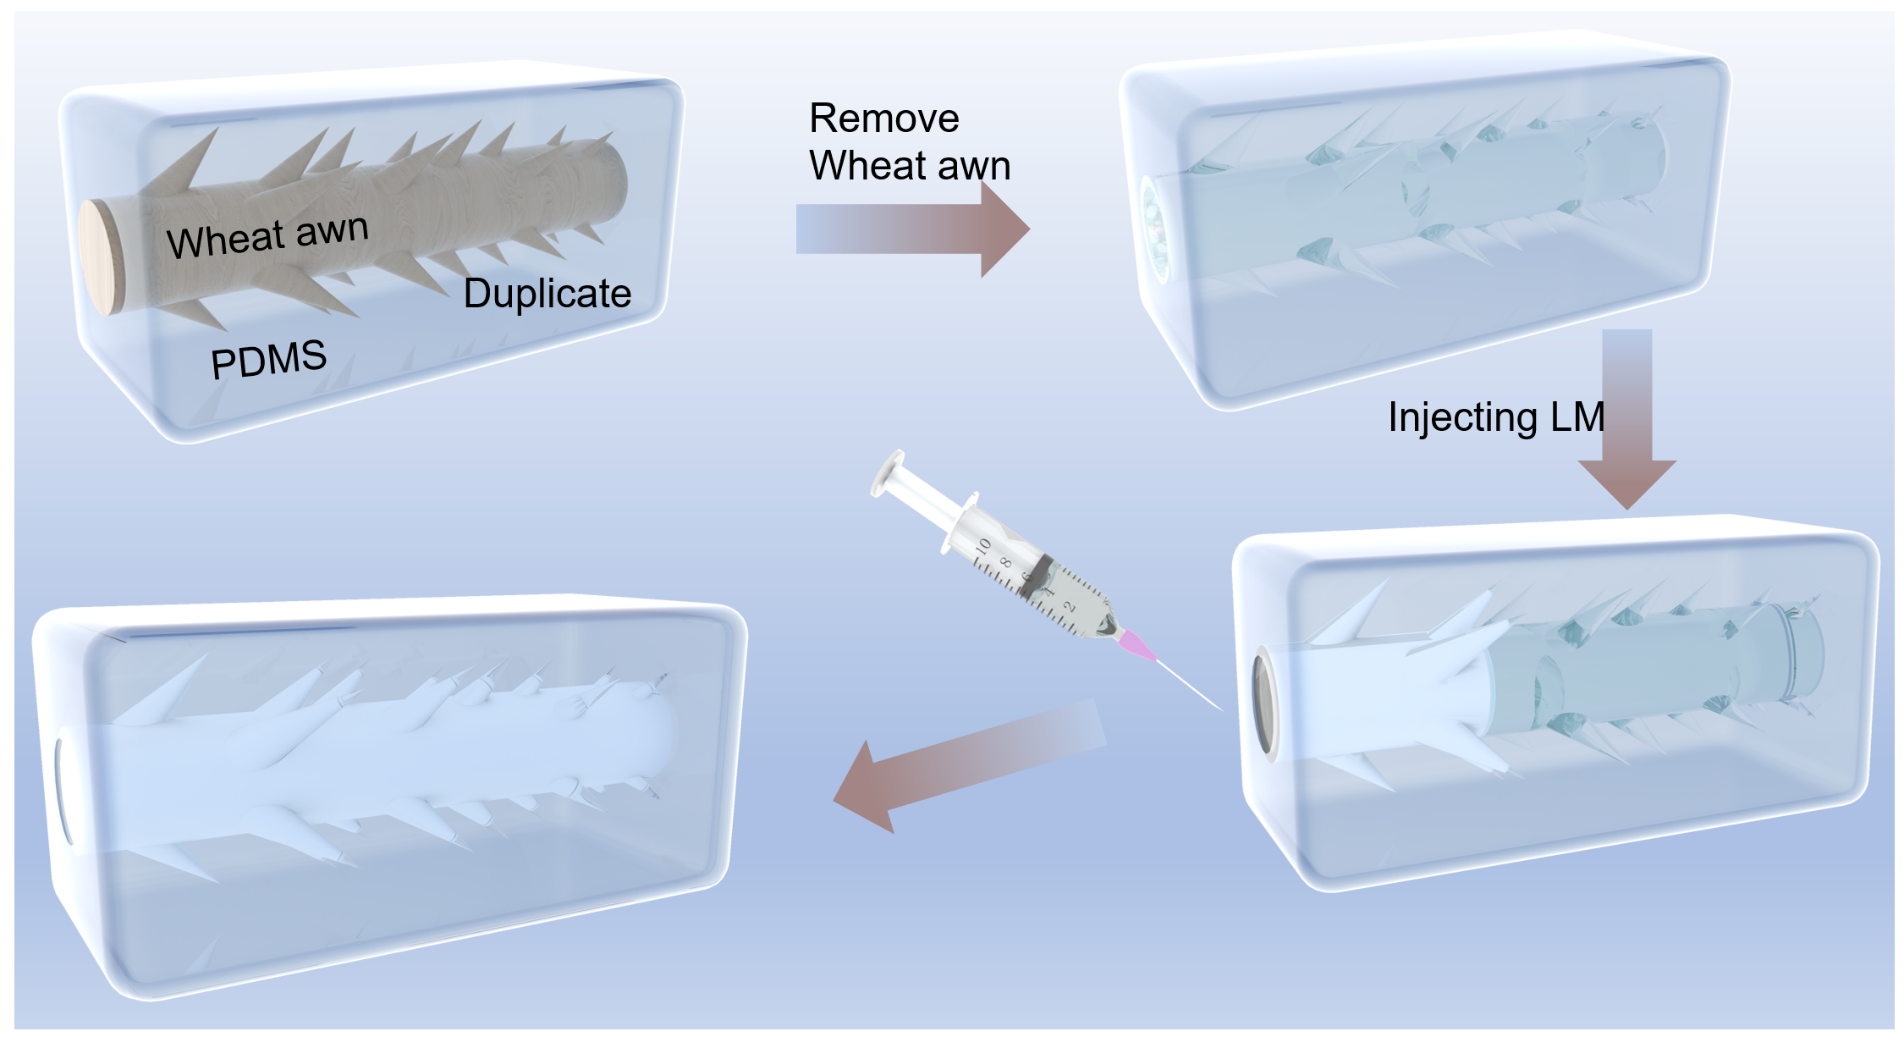


Figure S1. Preparation of LMT.

2. Characterization

2.1Distribution of LM at various positions within the channel


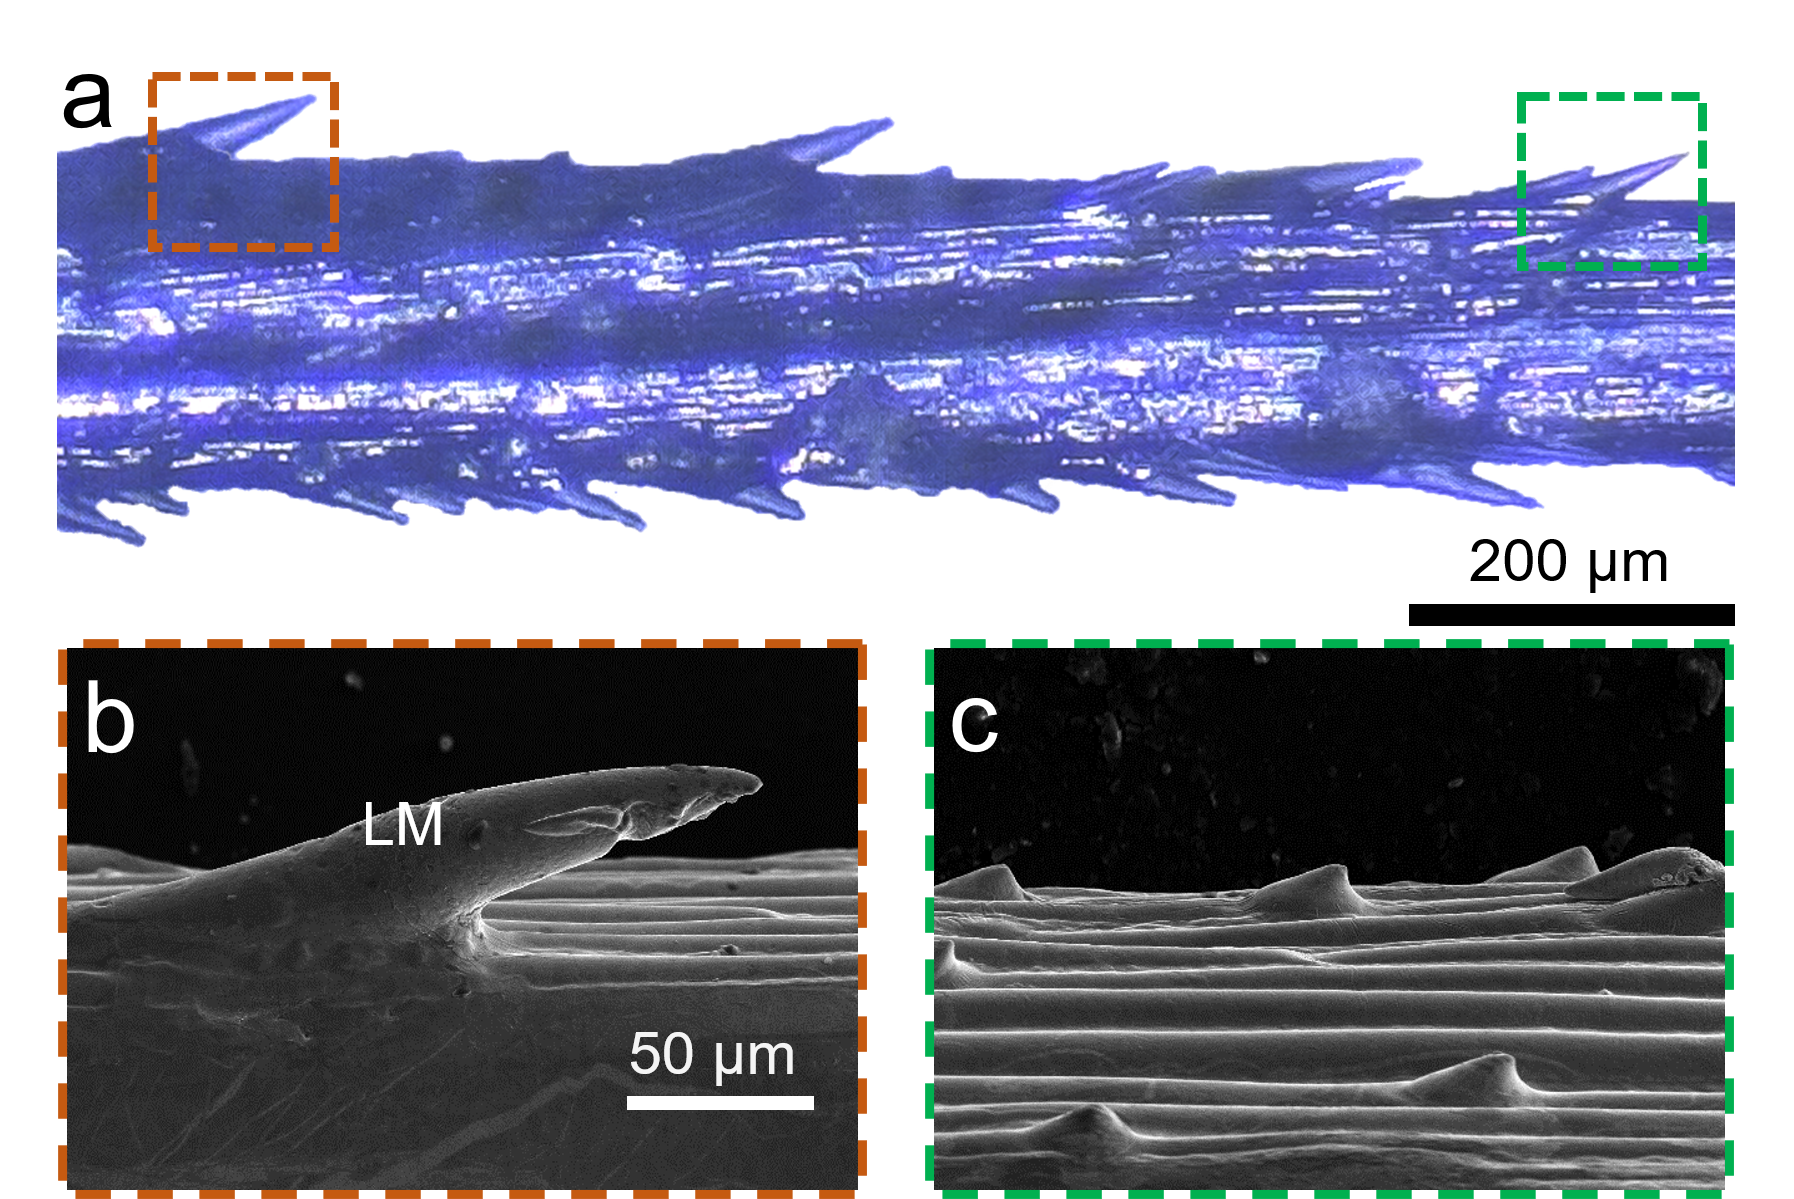


Figure S2. Distribution of LM at various positions within the channel.

After injecting the LM into the microchannels, the transparency of PDMS enables clear observation of its distribution within the channels under an optical microscope. Images captured reveal a gradient distribution of the LM within the microstructural valley, demonstrating a gradual decrease in concentration (Fig. S2a).

The eInBiSn with melting point of 90 oC undergoes melting and is injected into the microchannel interior. Following cooling to room temperature and solidification, a metallic rod featuring micro-conical protrusions is produced to elucidate the distribution of LM within the microchannels. SEM images reveal that the dimensions of the conical structures proximal to the injection port exceed those at the outlet, highlighting a gradient distribution of LM within the microchannels (fig. S2b-c).

2.2 Record of electrical signals

The electrical signals when the LMT was rotating were measured by a digital multimeter (Agilent 34420A, USA). The testing procedure entails encapsulating both ends of the LMT sample with conductive silver paste and extending wire electrodes, each measuring 0.5 m in length. These electrodes are connected to an Agilent 34420A for the acquisition of resistance signals, with subsequent analysis necessitating the deduction of the wire's inherent resistance.

2.3 Raman analysis of PDMS

The silicon-oxygen bonds on the surface of PDMS were determined by confocal Raman microscope (inVia-Qontor).


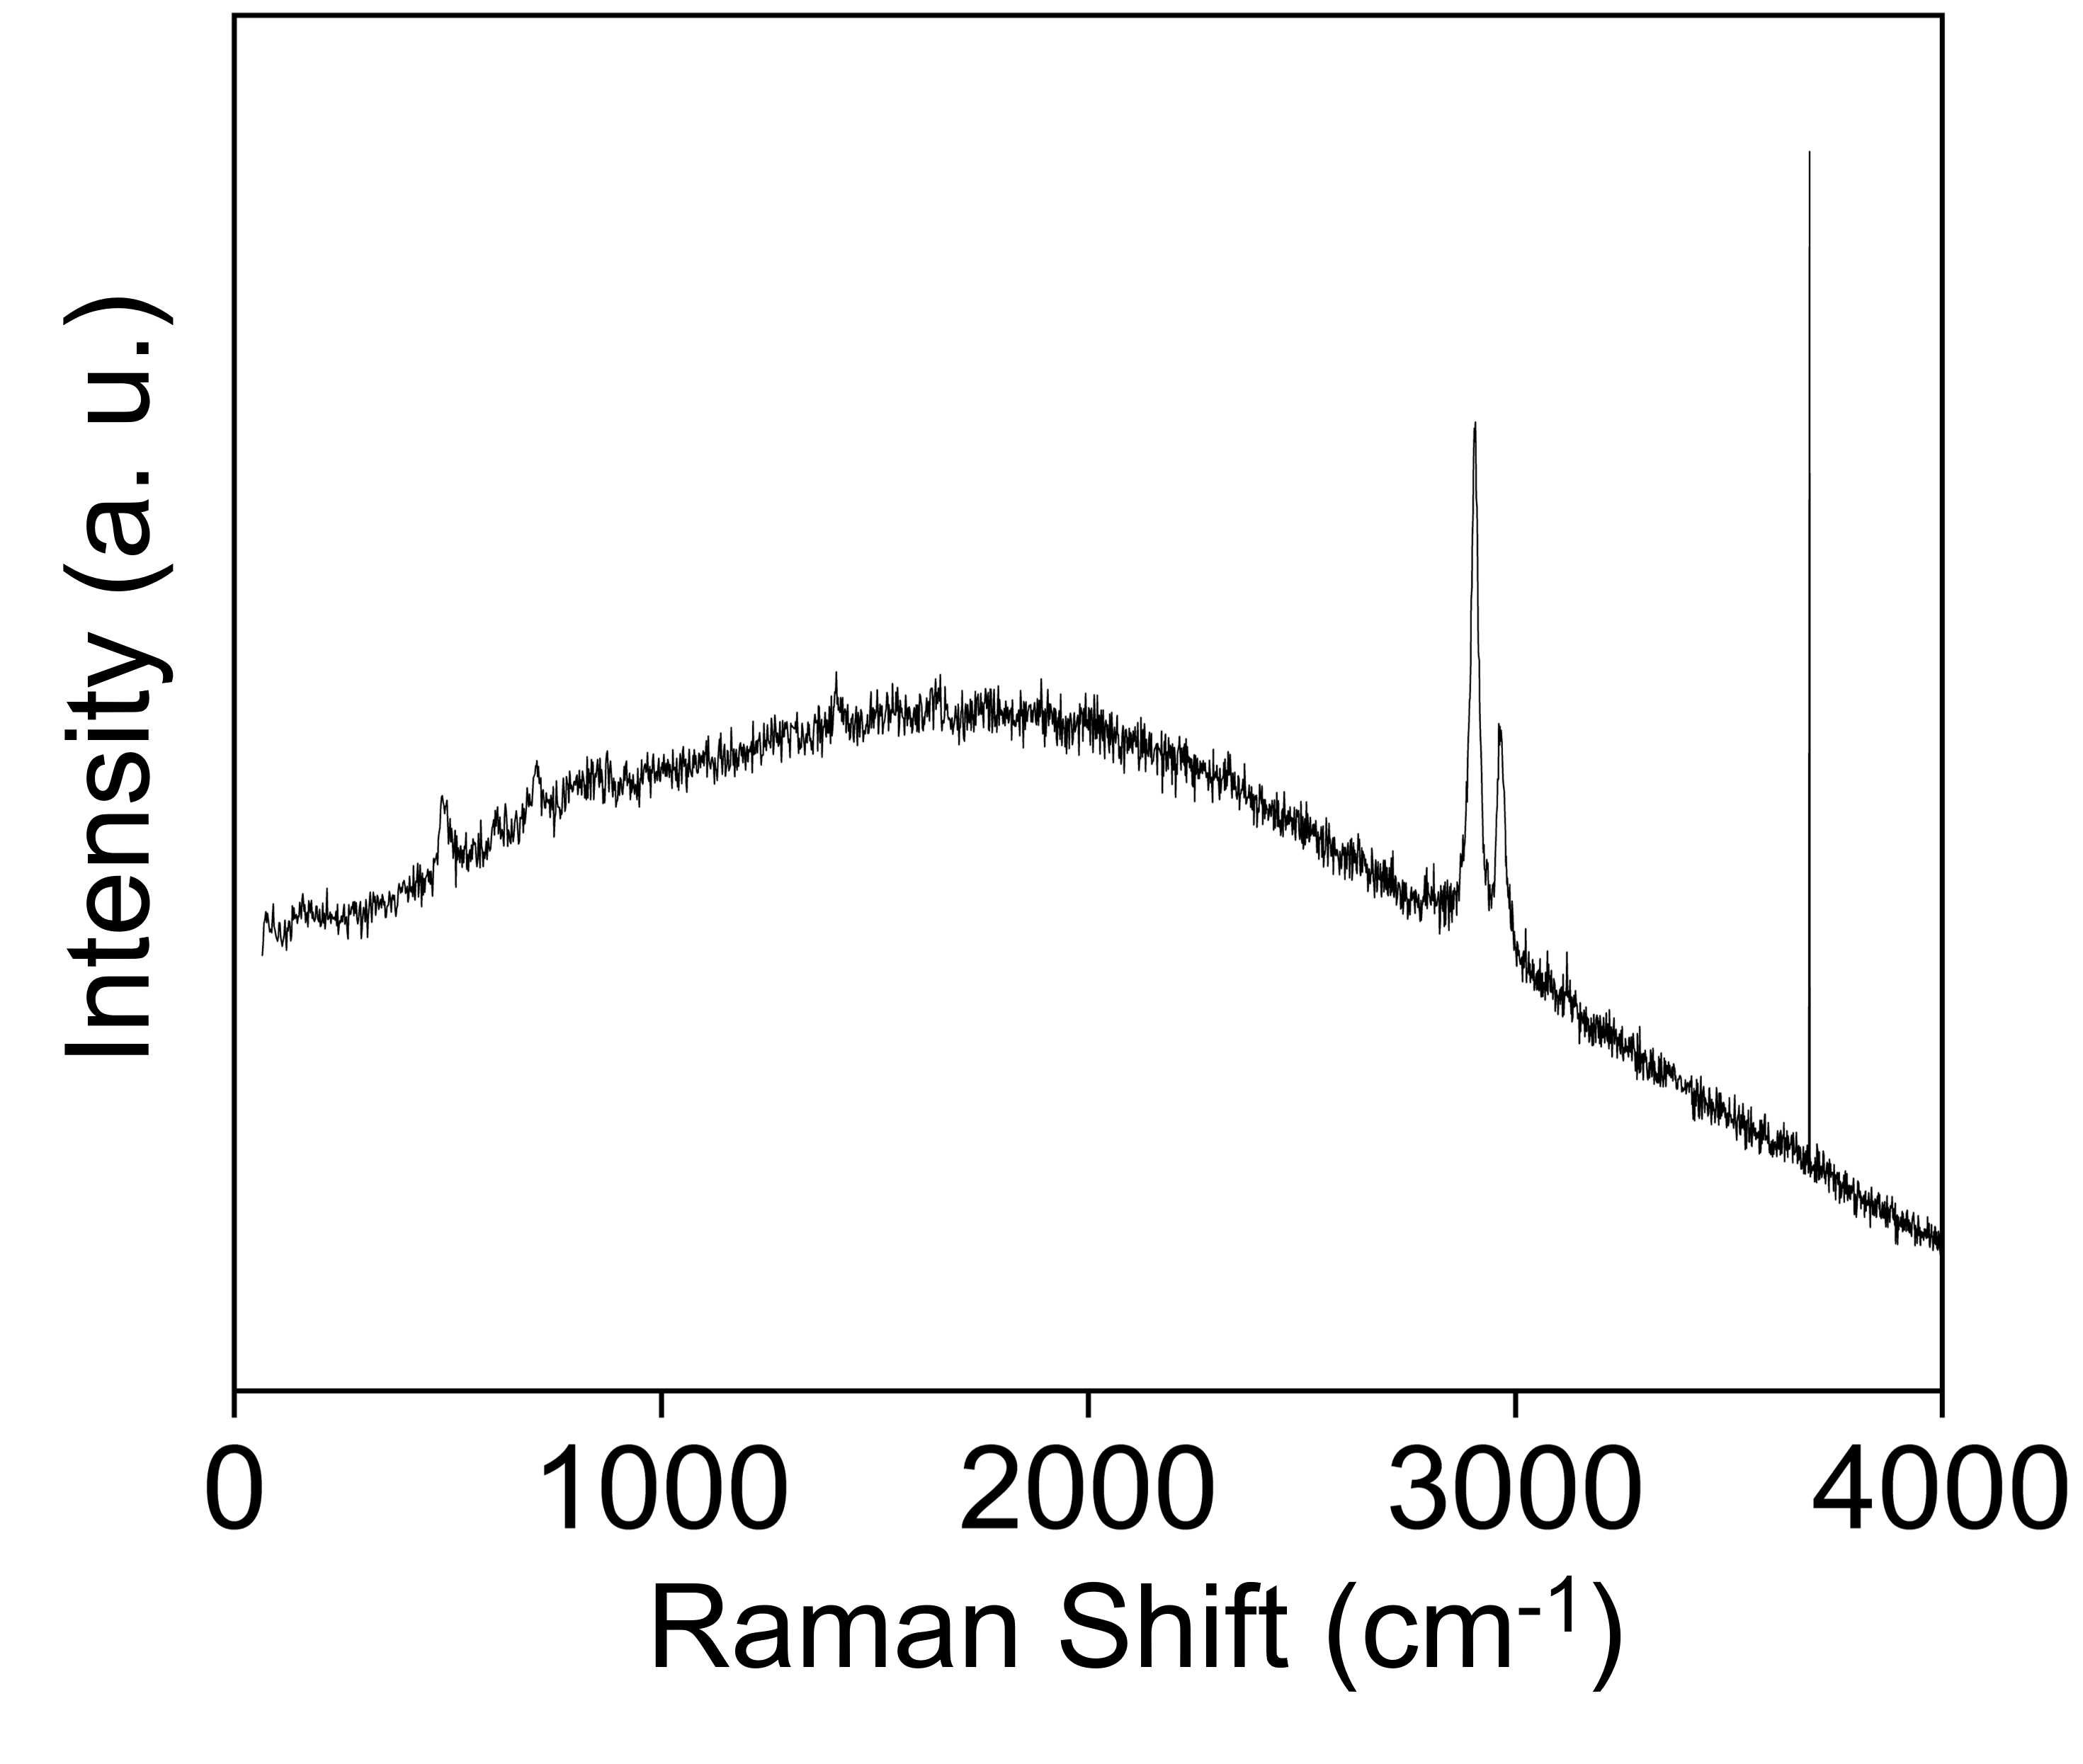


Figure S3. Raman spectra analysis of PDMS.

The detection of a peak at 490.6 cm-1, associated with the tensile vibration of Si-O-Si, indicates the presence of silicon-oxygen bonding on the surface of PDMS.

2.4 XPS analysis of LM

The Ga2O3 of LM surface was determined by X-Ray Photoelectron Spectroscopy (ESCALAB250 Xi).


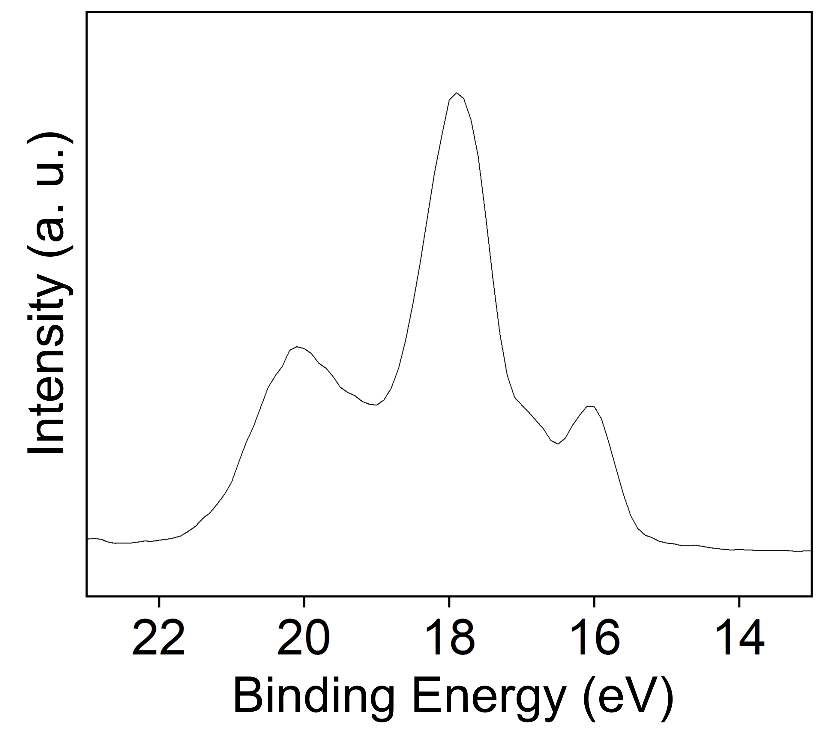


Figure S4. X-Ray Photoelectron Spectroscopy analysis of LM.

The presence of an oxide layer of LM is confirmed using depth-profile X-ray photoelectron spectroscopy (XPS) analysis. The Ga 3d spectra are used to characterize the surface oxidation state of LM. The LM surface exposed to the air (air/eGaIn (A/E) interface) forms a Ga2O3 layer corresponding to the native state Ga (III) peak at a binding energy of 20.4 eV.


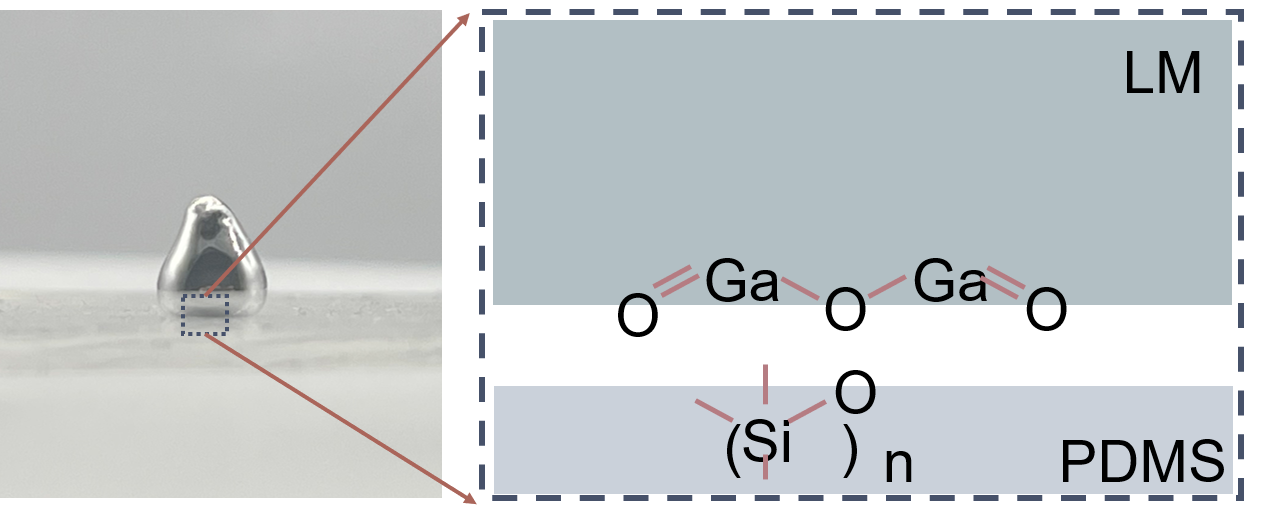


Figure S5. Adhesion mechanism between the oxide layer of Ga-LM and PDMS surface.


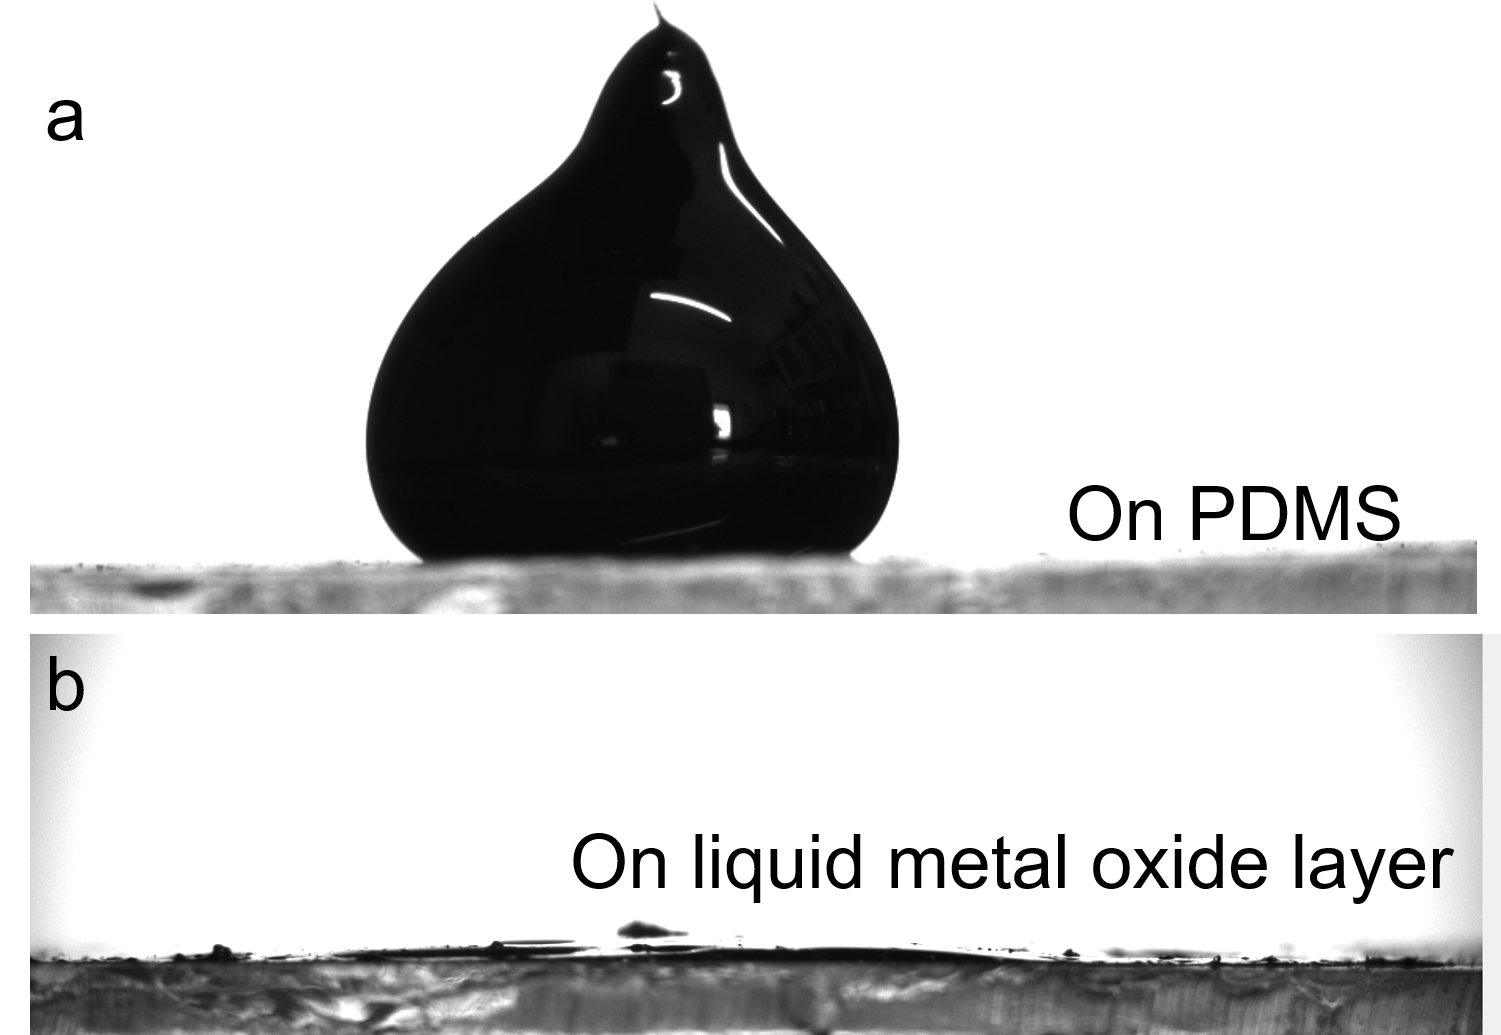


Figure S6. Contact state of liquid metal droplet on PDMS and liquid metal oxide layer surface.

3. Mechanism method


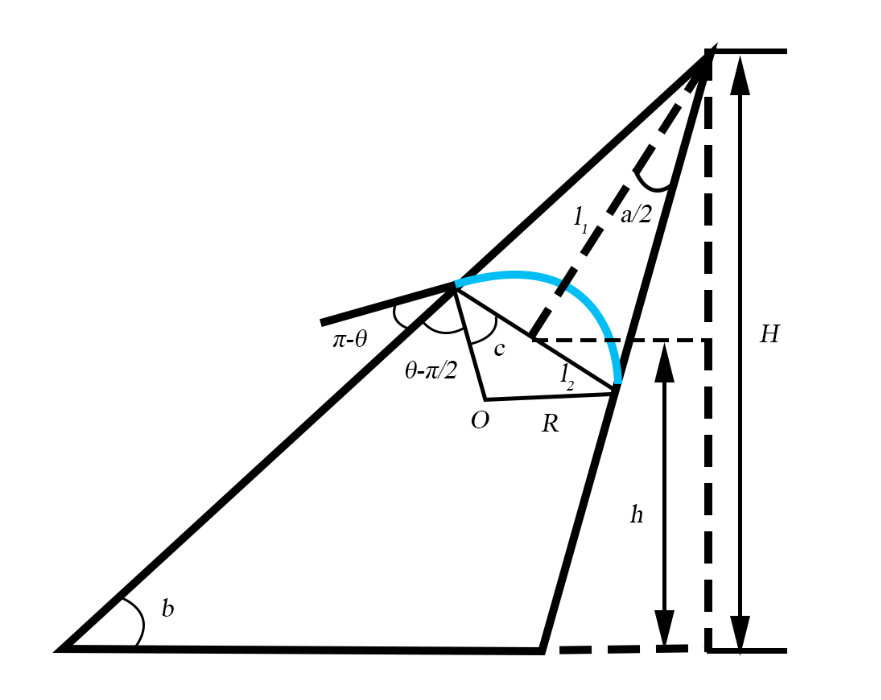


Figure S7. The dimensional size of the micro-cone structure and distribution of LM.

The geometric configuration of an anisotropic structure within the tiltmeter is illustrated in the diagram. The blue line delineates the interface between liquid metal and air. Parameters , , and are known values for the structure, represents the contact angle between the liquid metal and the wall, and signifies the curvature radius of the LM surface interface. Geometric relationships can be expressed as follows:

During the injection of liquid metal, the flow inside the pipeline can be described using Bernoulli's principle and can be shown as:

Where is the atmospheric pressure, is the pressure during injection, is the velocity inside the channel, is the friction coefficient along the path, and is the channel diameter.


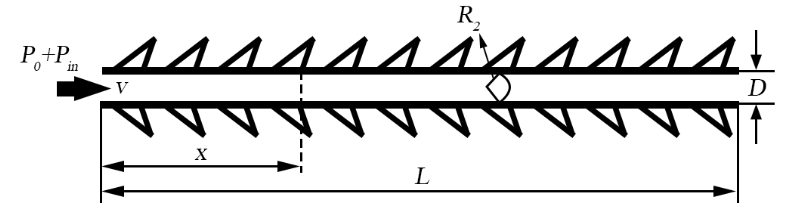


Figure S8. Schematic diagram of the microchannel structure.

Therefore, the pressure at the position can be expressed as:


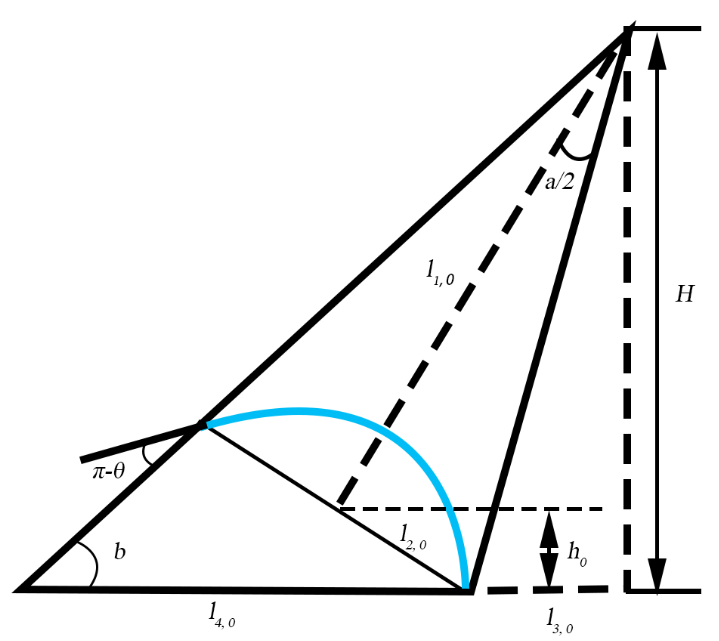


Figure S9. Schematic diagram of LM flowing through micro-cone structures.

The initial state of LM is shown in the figure below. At this time, the liquid level height can be obtained from geometric relations:

Therefore, the initial volume of air can be express as:

When LM exerts pressure on the air, the volume of the gas will be compressed. At this point, the volume of the gas can be expressed as:

Once the pressure at the surface of the LM stabilizes, the relationship can be expressed as:

Therefore, by solving equation (21), the height of the LM during injection can be obtained. And when the LM flows out, the pressure at the outlet is .


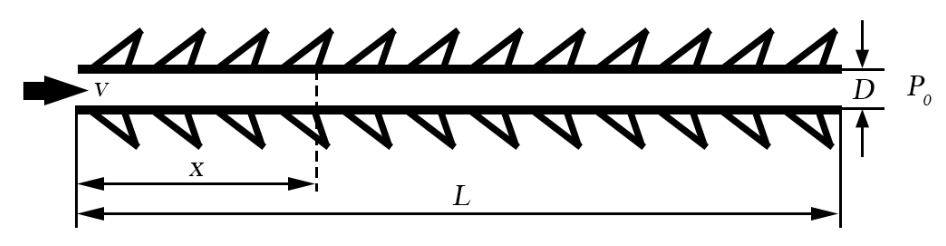


Figure S10. Schematic diagram of LM flowing out from the outlet end.

Similarly, when the liquid metal exerts pressure on the air, the relationship between the pressure of the gas and LM and the surface tension at the interface can be expressed as:

Solving equation 25 will yield the height after injecting LM.

After LM is confined within the microchannel, the height of the LM surface will change with variations in pressure during the rotation process.


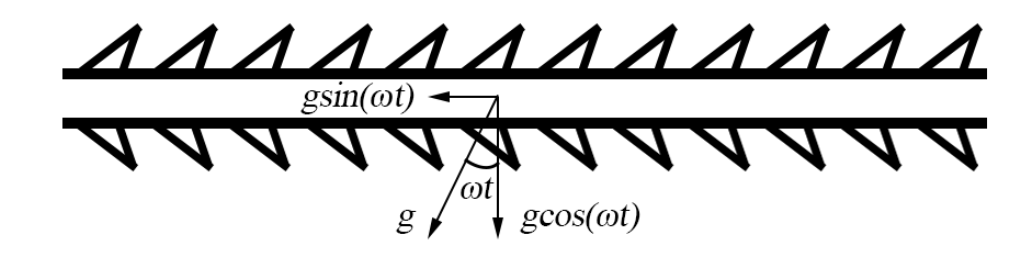


Figure S11. Force analysis of LM during the rotation process of the tiltmeter.

If the coordinate system is established on the tiltmeter, and the tiltmeter rotates counterclockwise with a speed of in the inertial coordinate system, then in this non-inertial coordinate system, it can be considered as the gravitational field rotating clockwise. Therefore:

For the flow of LM, it can be described by the Navier-Stokes equations:

For this tiltmeter, considering both ends are sealed, and the length is much greater than the diameter, it can be assumed that the velocity is , and the pressure difference caused by the y-direction (height difference due to diameter) can be neglected.

Before rotation, the pressure of the tiltmeter is in equilibrium and can be considered a constant value .

The change in additional pressure at a distance from the injection port during the rotation process can be expressed as:

Assuming the initial gas volume is , it can be express as:


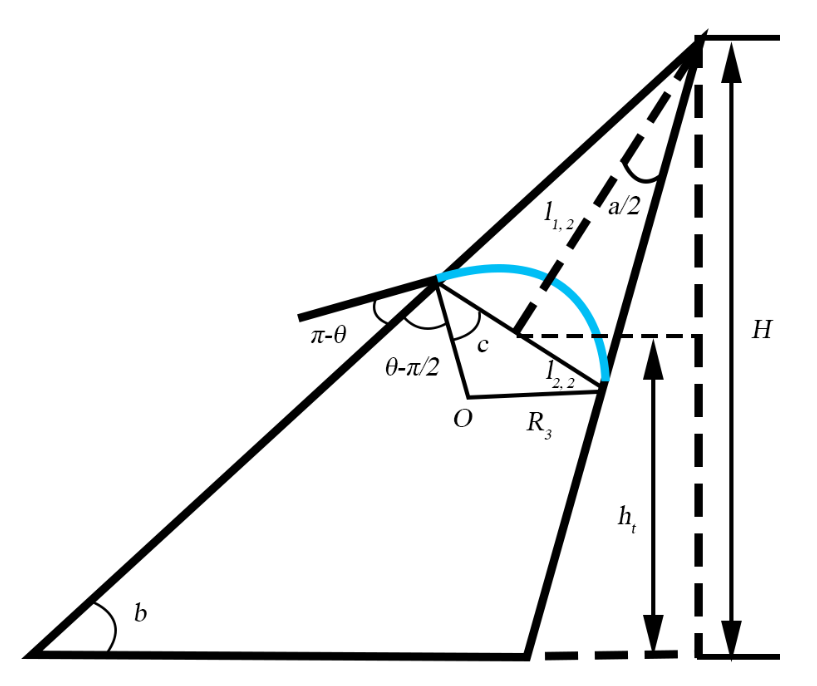


Figure S12. Height analysis of LM during the rotation process of the tiltmeter.

As time changes, there is a relationship between the pressure of LM and gas and the surface tension:


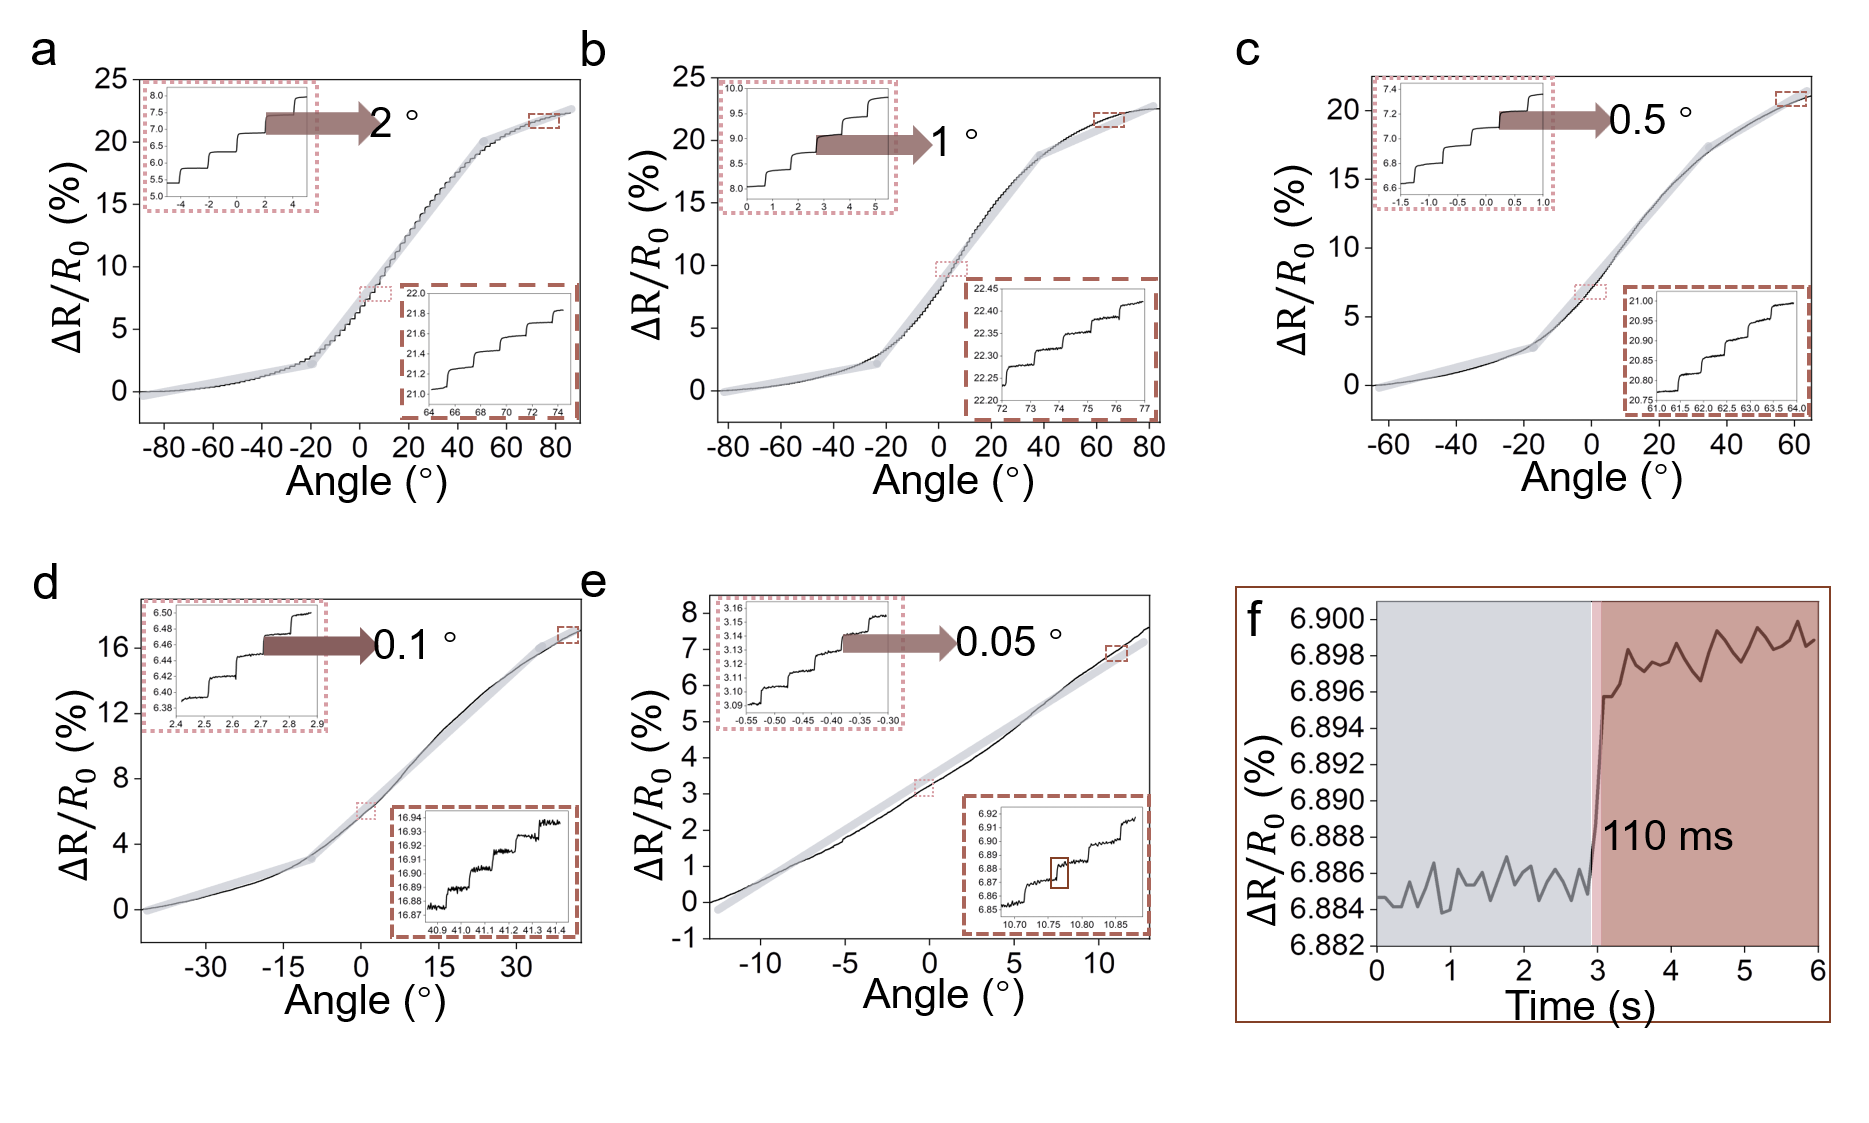


Figure S13. The accuracy of LMT within different measurement ranges.

In this study, the accuracy of the proposed tiltmeter was tested using an electric turntable and the Agilent 34420A electrical signal acquisition equipment. The test results indicate that as the measurement range decreases, the detection accuracy of the tiltmeter gradually improves. The tiltmeter achieves a detection accuracy of 2o, 1o, 0.5o, 0.1o and 0.05o (Fig. S13a-e). Rapid response time (Fig. S13f).


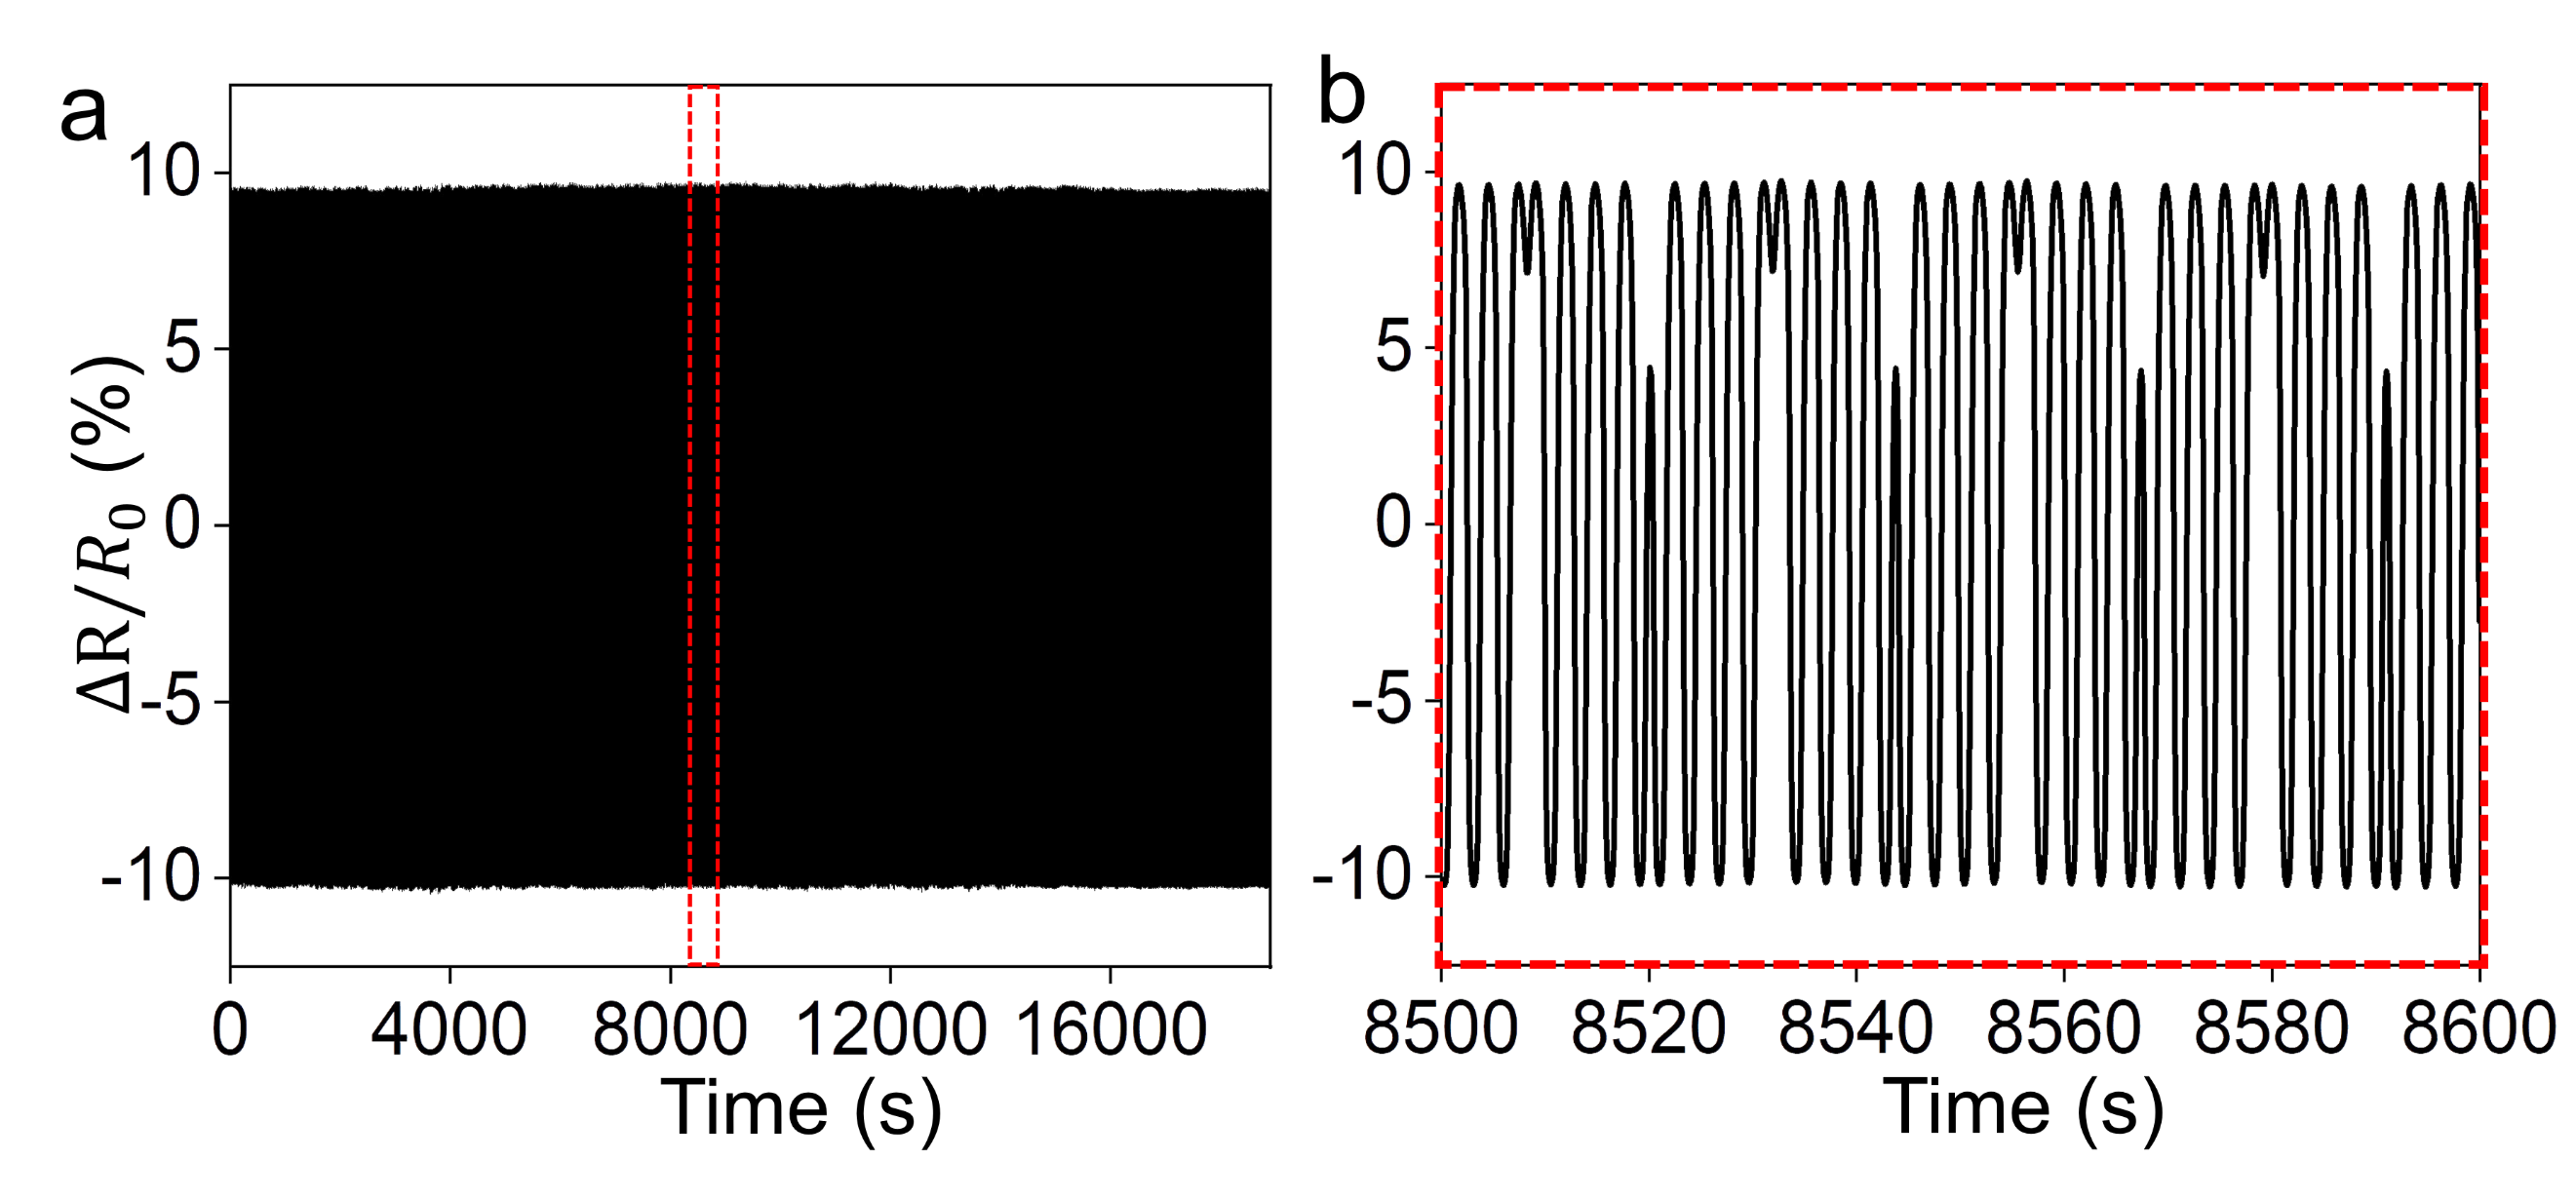


Figure S14. Durability test.

4. Simulation

4.1 Simulation method

Utilizing COMSOL software, a two-dimensional model has been established to investigate the angular sensing characteristics of anisotropic structures under external forces and reveal their two-phase and flow characteristics. Based on the mathematical model of the general form of the Navier-Stokes equations (Newtonian fluid model):

An energy-based diffuse interface model (phase-field model) can easily describe the flow of two-phase fluids. This phase-field model can be expressed as:

(unit: N) represents the mixed energy density, (unit: m) represents the capillary width proportional to the interface thickness. These two parameters are interrelated with the surface tension coefficient (SI unit: N/m). , defined as the derivative of external free energy with respect to , is set to zero.

is the mobility, related to ε through , where χ is the mobility adjustment parameter (default set to 1). The volume fractions of fluid 1 and fluid 2 are calculated as:

Therefore, the average density, viscosity, and electrical conductivity can be expressed as:

The mean curvature (unit: 1/m) can be calculated using the following expression:

In the formula, represents the chemical potential, defined as:

The surface tension acting on the interface can be expressed in the form of a volume force as:

The wetting wall condition is given to specify the contact angle of the fluid. The mass flow through the wet wall is zero, as given by the following equation.

In the tiltmeter, the behavior of the fluid affects the redistribution of the conductive medium, causing a change in resistance. The current density can be expressed by conduction current and displacement current as:

Where and represent the vacuum permittivity and relative permittivity, respectively, while denotes the electromotive force. Additionally, the current density must adhere to the current conservation equation:

4.2 Simulation parameters

**
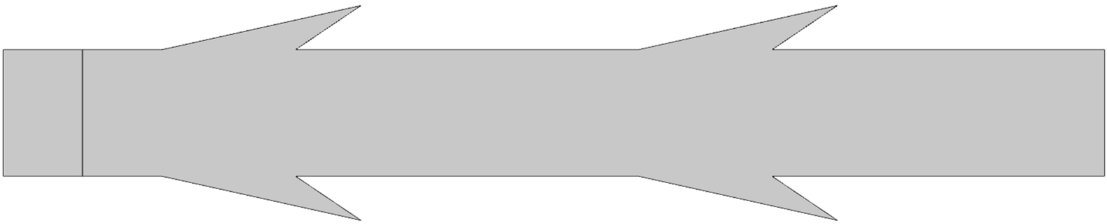
**

Figure S15. Geometric model of simulation process.

In the simulation work, due to the significant disparity in length between the channel and the dimensions of anisotropic structures, it is not suitable for overall simulation. Therefore, a length unit of the tiltmeter is taken for simulation work to conduct qualitative analysis. The relevant parameters during the simulation process are shown in the table S1:

Table S1. The parameters of simulation.

| Parameters | Value | Notes |
| --- | --- | --- |
|  |  | Diameter |
|  |  | Length |
|  |  | Injection speed |
|  |  | The angle between the anisotropic structure and the channel |
|  |  | Contact angle of eGaIn with PDMS |
|  |  | Microstructure scale multiple |
|  |  | Electrical conductivity |
|  |  | The density of LM |
|  |  | Surface tension coefficient |
|  |  | The number of Microstructures per unit length |
|  |  | Multiplier of unit length |
|  |  | Reynolds number |
|  |  | Rotation speed of the tiltmeter |

4.3 Simulation results and discussion


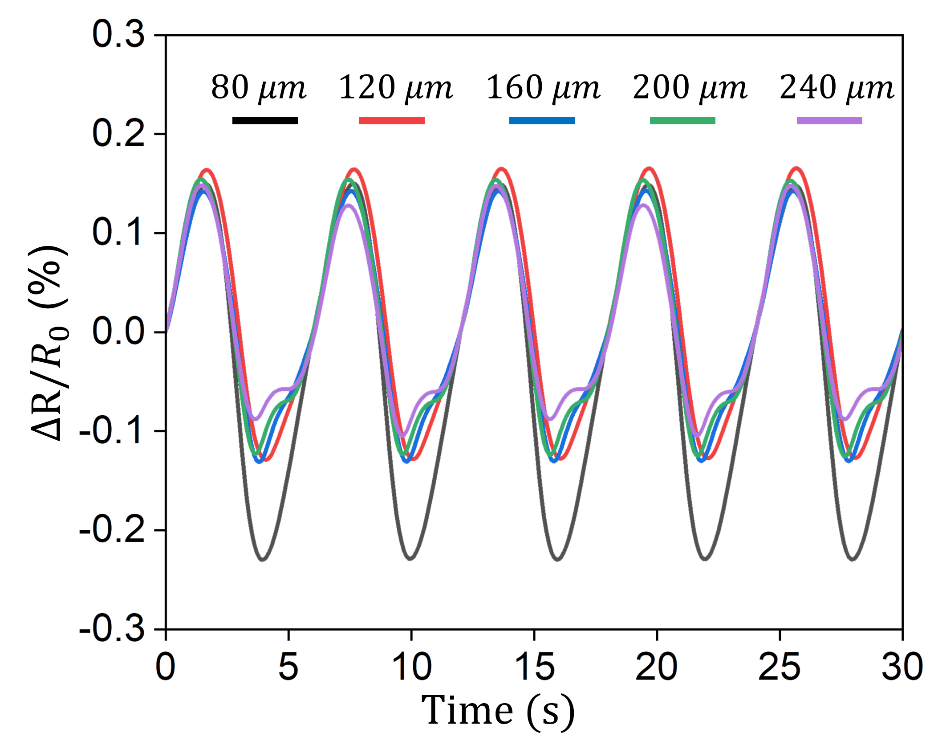


Figure S16. Impact of on electrical signal.

Simulation and analysis of the variation in resistance signals of LMT within microchannels revealed a notable trend: as the microchannel's inner diameter increased gradually from 80 µm to 240 µm, the maximum rate of resistance change during rotation showed a consistent decrease. Starting from 0.38% resistance change rate at an 80 µm inner diameter, it decreased to 0.24% at 240 µm.


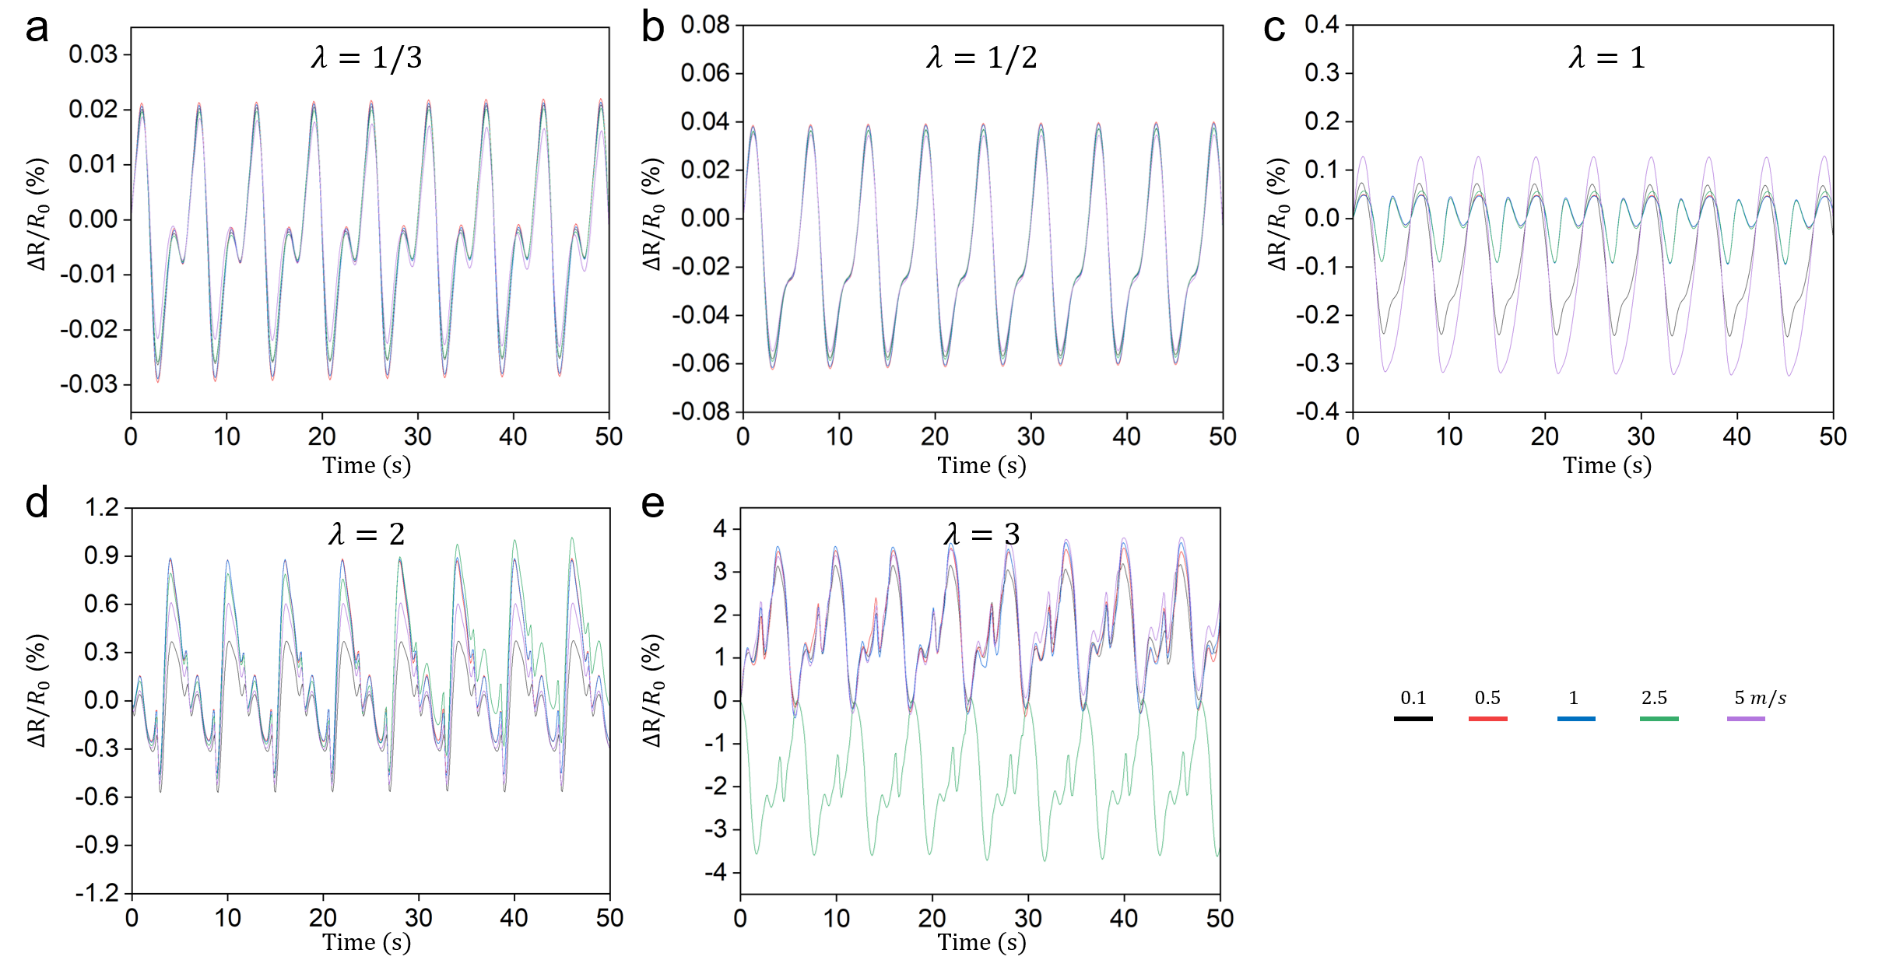


Figure S17. The impact of the of LM and the on the strength of the electrical signal with the is 160o.

The simulation results indicate that when *θ* is 160o, the intensity of electrical signal variation generally increases with the enlargement of the scaling factor *λ*. As *λ* gradually increases from 1/3 to 3, the intensity of electrical signal variation increases by two orders of magnitude. This suggests that the anisotropic structures inside the microchannel are the primary factor influencing the intensity of electrical signal variation. Additionally, beyond a *λ* value of 1, the resistance signal no longer exhibits a sinusoidal trend with the increasing injection velocity of the LM. This suggests that when the dimensions of the microstructures become too large, the capillary action within the microstructural valley can no longer effectively restrain the deformation of the LM.


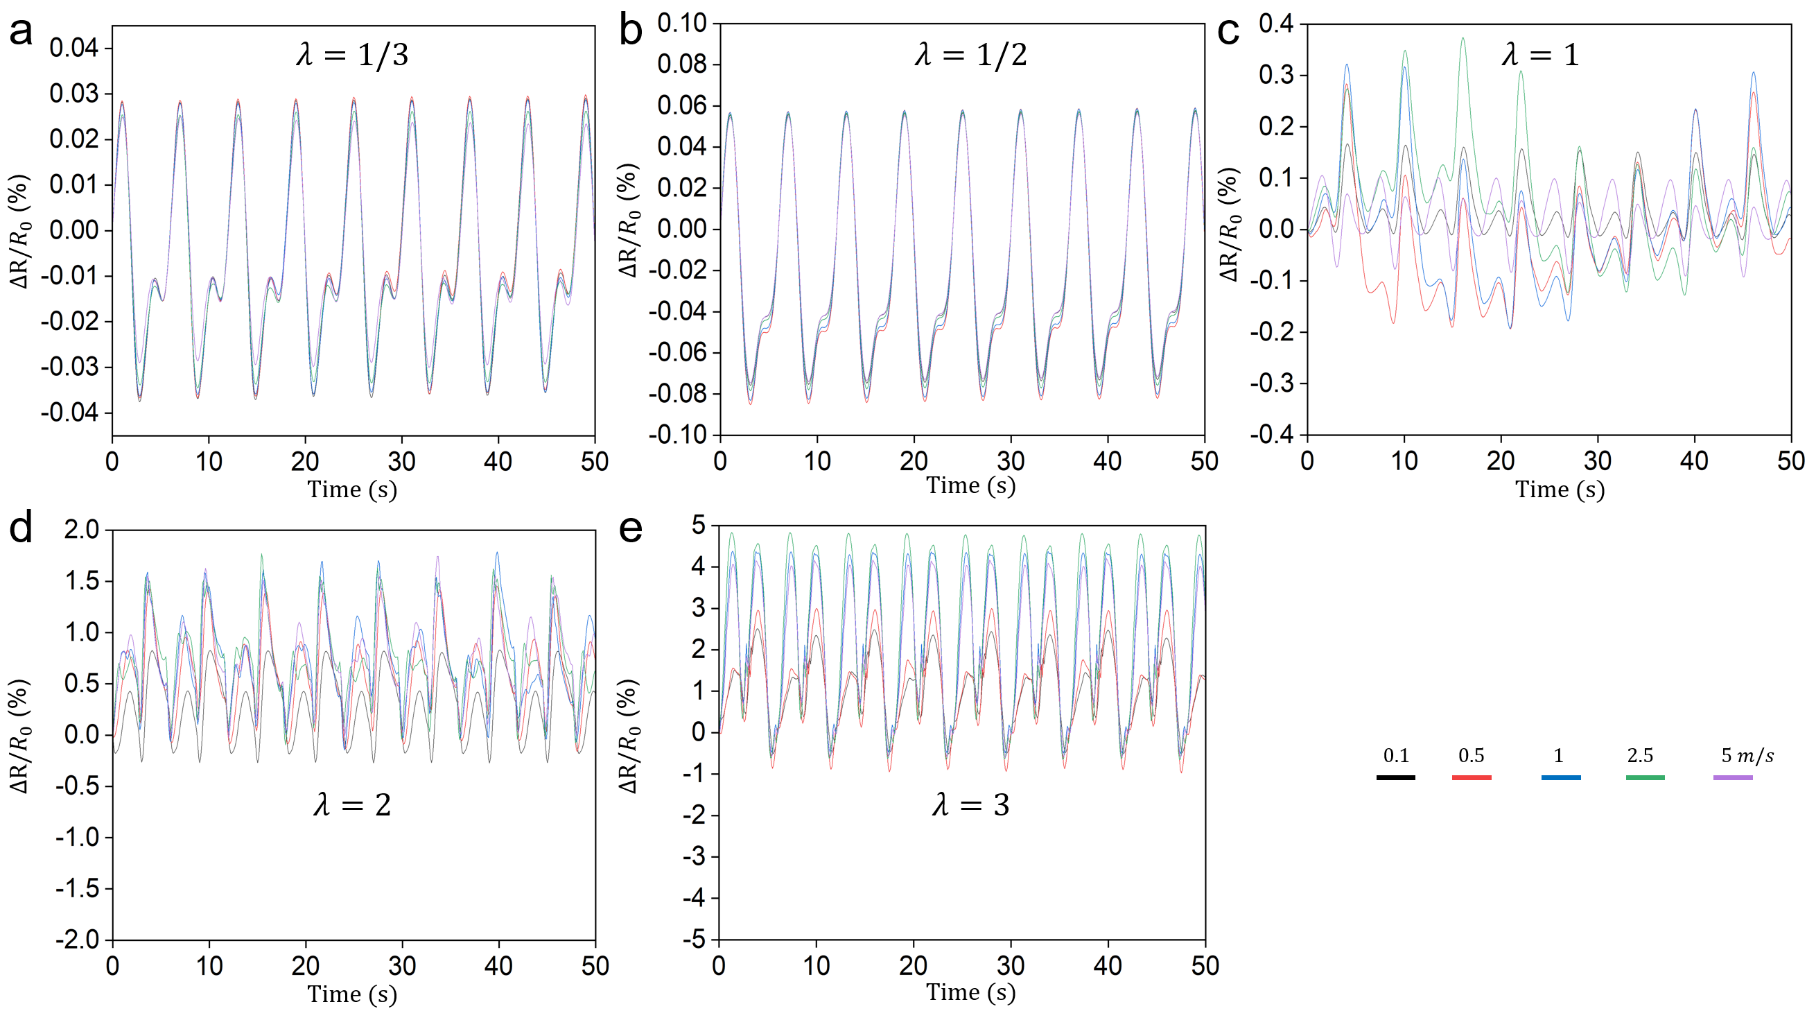


Figure S18. The impact of the of LM and the on the strength of the electrical signal with the is 145o.

The simulation results reveal that the intensity of electrical signal variation generally increases with the enlargement of the scaling factor *λ* when the *θ* is 145o. As *λ* gradually increases from 1/3 to 3, the intensity of electrical signal variation increases by two orders of magnitude. This indicates that the anisotropic structures inside the microchannel are the primary factor influencing the intensity of electrical signal variation. Additionally, for each different *λ* value, the intensity of electrical signal variation exhibits an initial increase followed by a decrease as the velocity *v* of the LM increases. This trend aligns with experimental observations, suggesting that the distribution state of the LM induced by *v* also affects the intensity of electrical signal variation in the LMT.


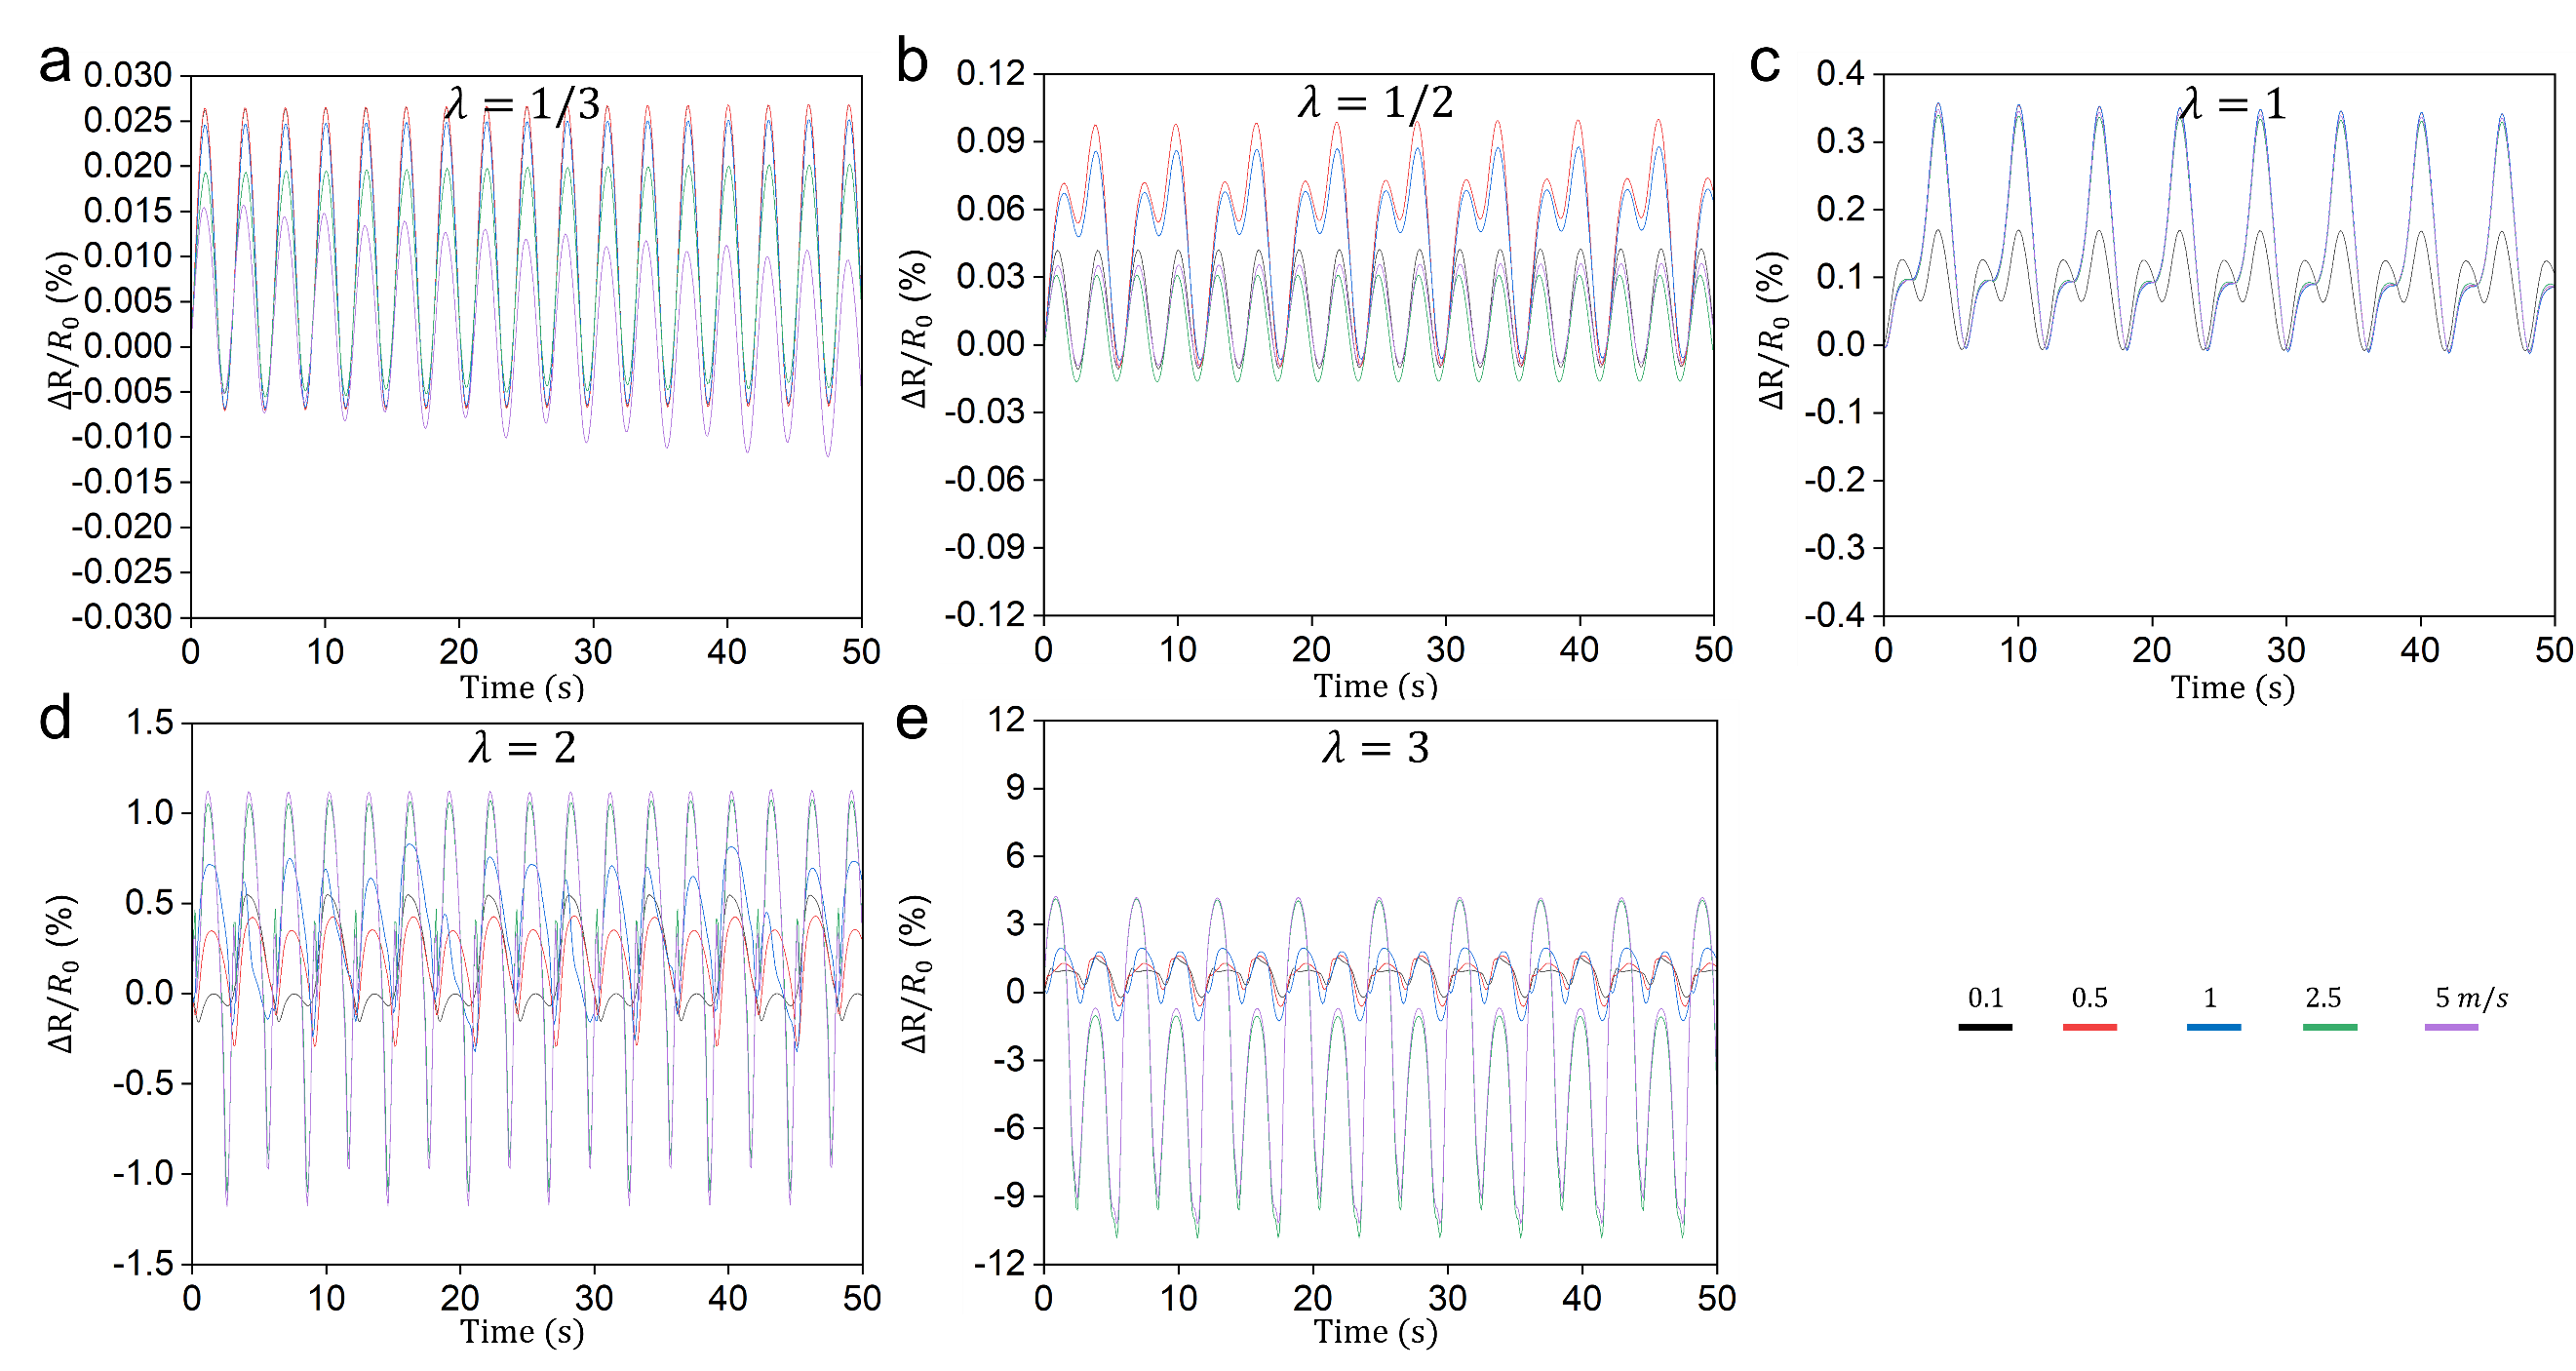


Figure S19. The impact of the of LM and the on the strength of the electrical signal with the is 90o.

The simulation results reveal that when *θ* is 90 degrees, the intensity of electrical signal variation generally increases with the enlargement of the scaling factor *λ*. As *λ* gradually increases from 1/3 to 3, the intensity of electrical signal variation increases by two orders of magnitude. This suggests that the anisotropic structures inside the microchannel primarily influence the intensity of electrical signal variation. Additionally, beyond a *λ* value of 1/2, the resistance signal no longer follows a sinusoidal trend with increasing injection velocity of the LM. This indicates that when the dimensions of the microstructures become too large, capillary action within the microstructural valley fails to effectively restrain the deformation of the LM. Moreover, larger angles between the microstructures and the inner wall are less conducive to the resistance signal exhibiting sinusoidal periodic variations.


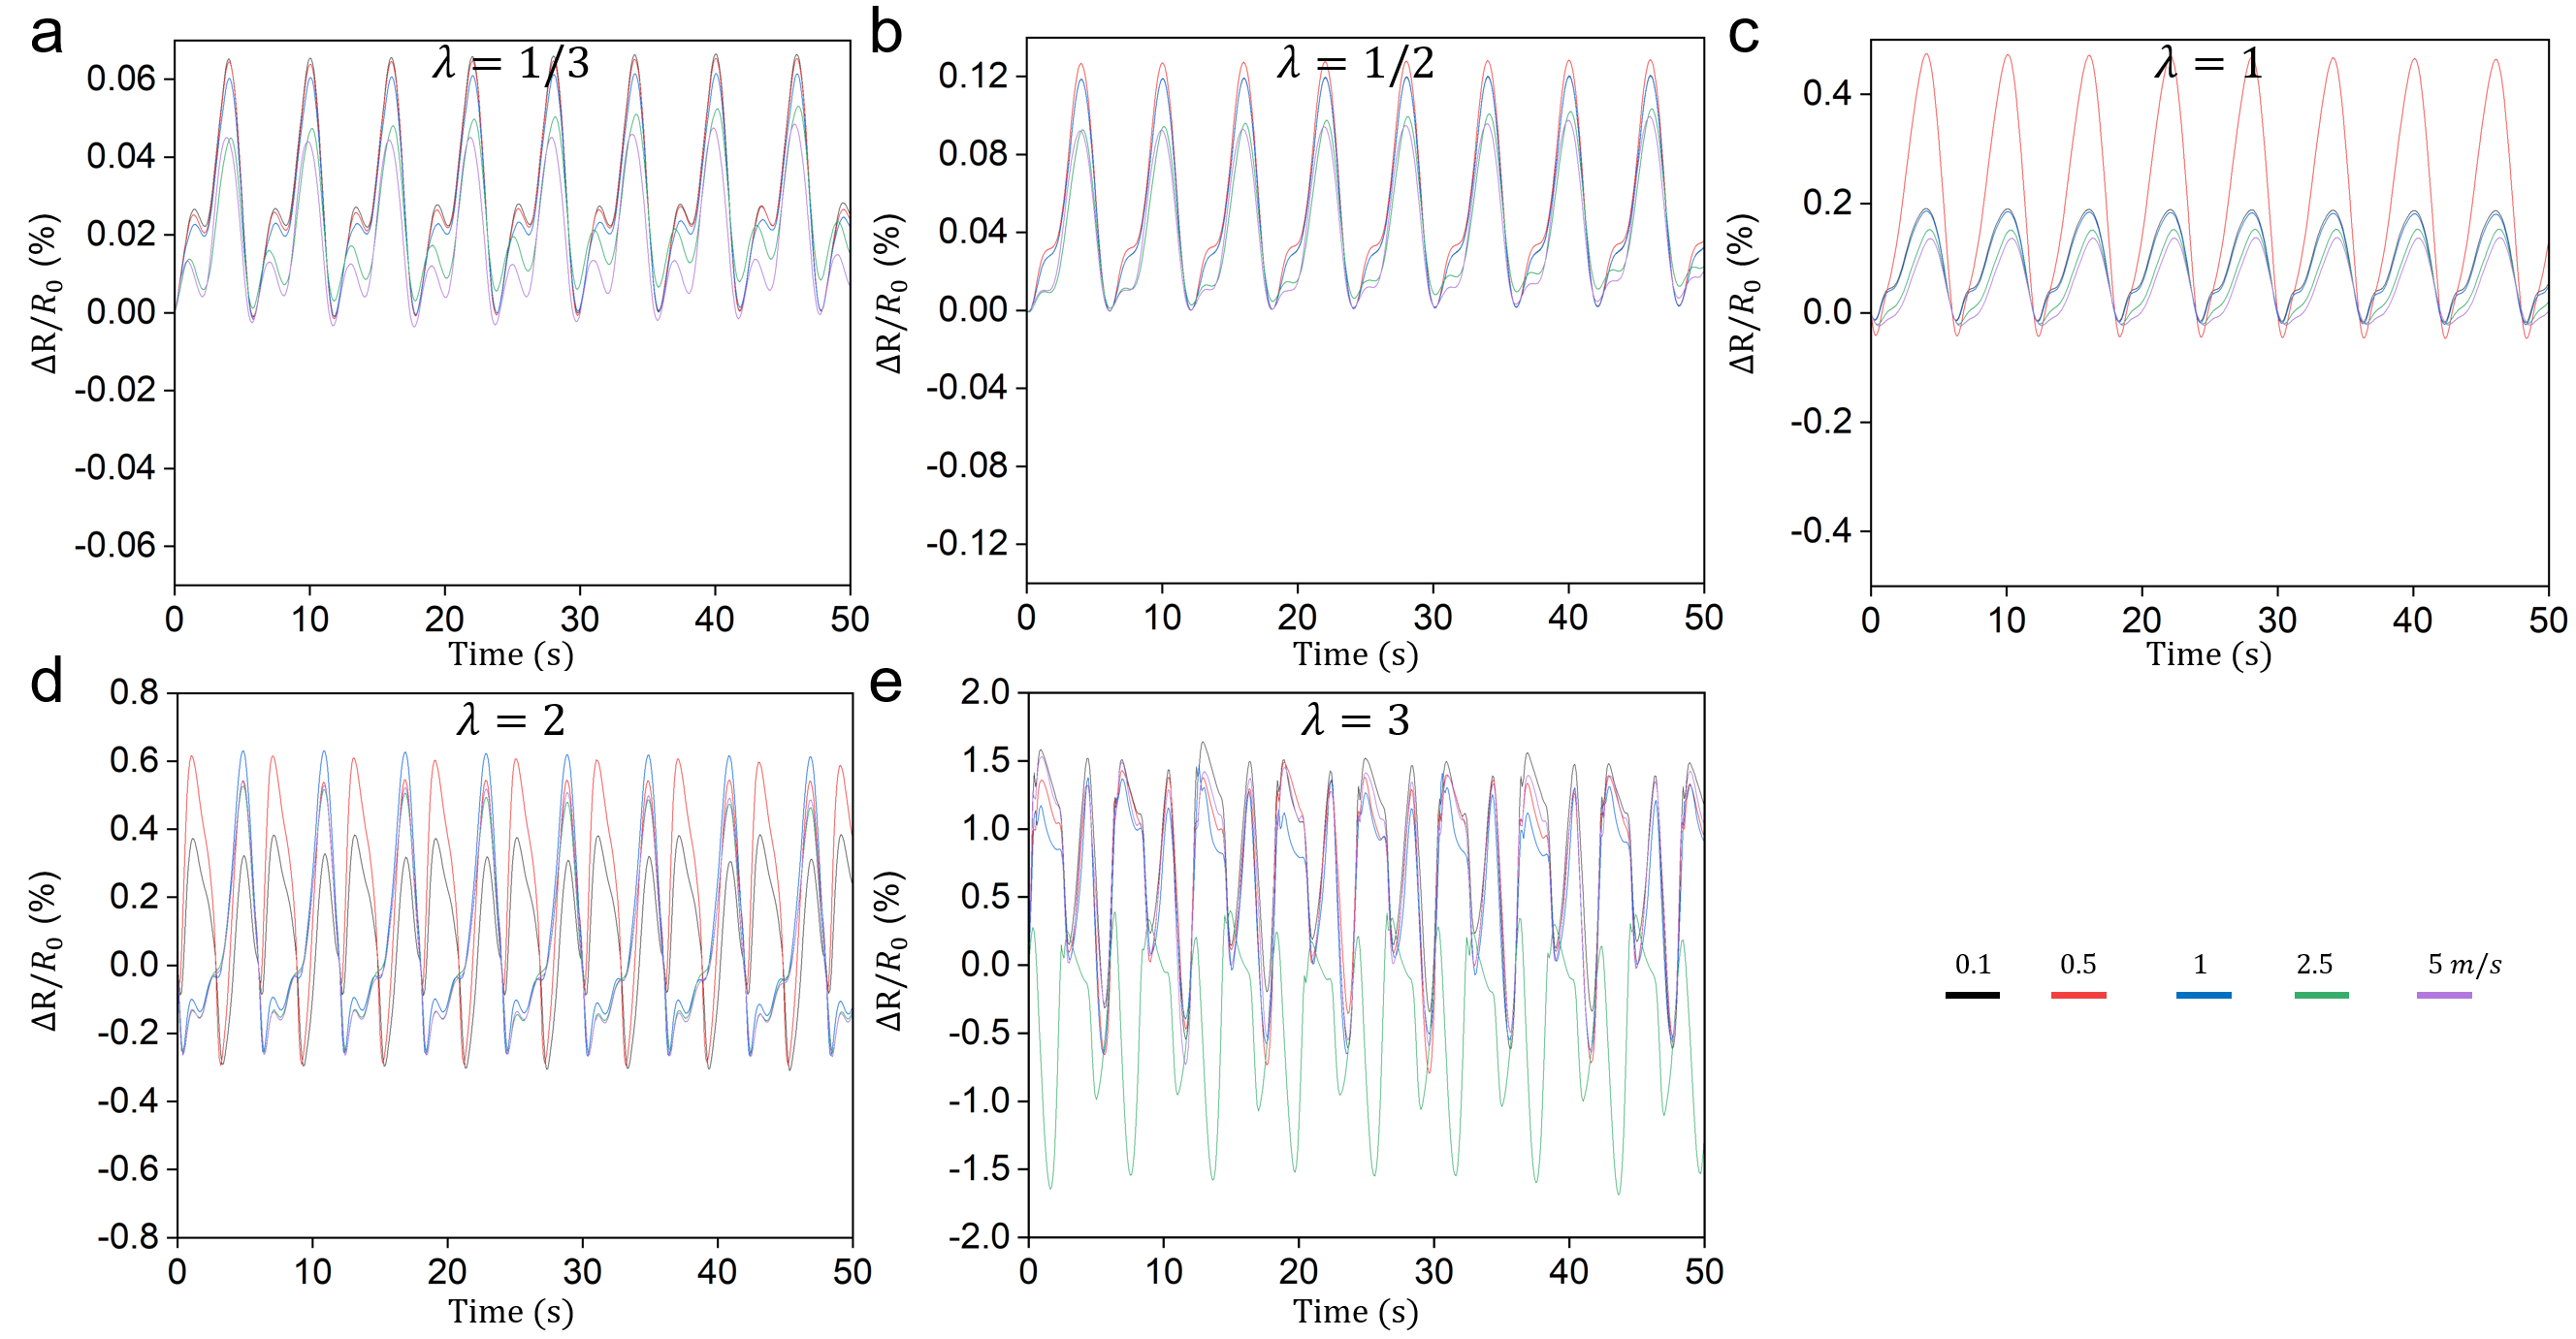


Figure S20. The impact of the of LM and the on the strength of the electrical signal with the is 35o.

The simulation results indicate that when *θ* is 35 degrees, the intensity of electrical signal variation generally increases with the enlargement of the scaling factor *λ*. As *λ* gradually increases from 1/3 to 3, the intensity of electrical signal variation increases by two orders of magnitude. This suggests that the anisotropic structures inside the microchannel are the primary factor influencing the intensity of electrical signal variation. Additionally, beyond a *λ* value of 3, the resistance signal no longer exhibits a sinusoidal trend with the increasing injection velocity of the LM. This indicates that when the dimensions of the microstructures become too large, capillary action within the microstructural valley fails to effectively restrain the deformation of the LM.


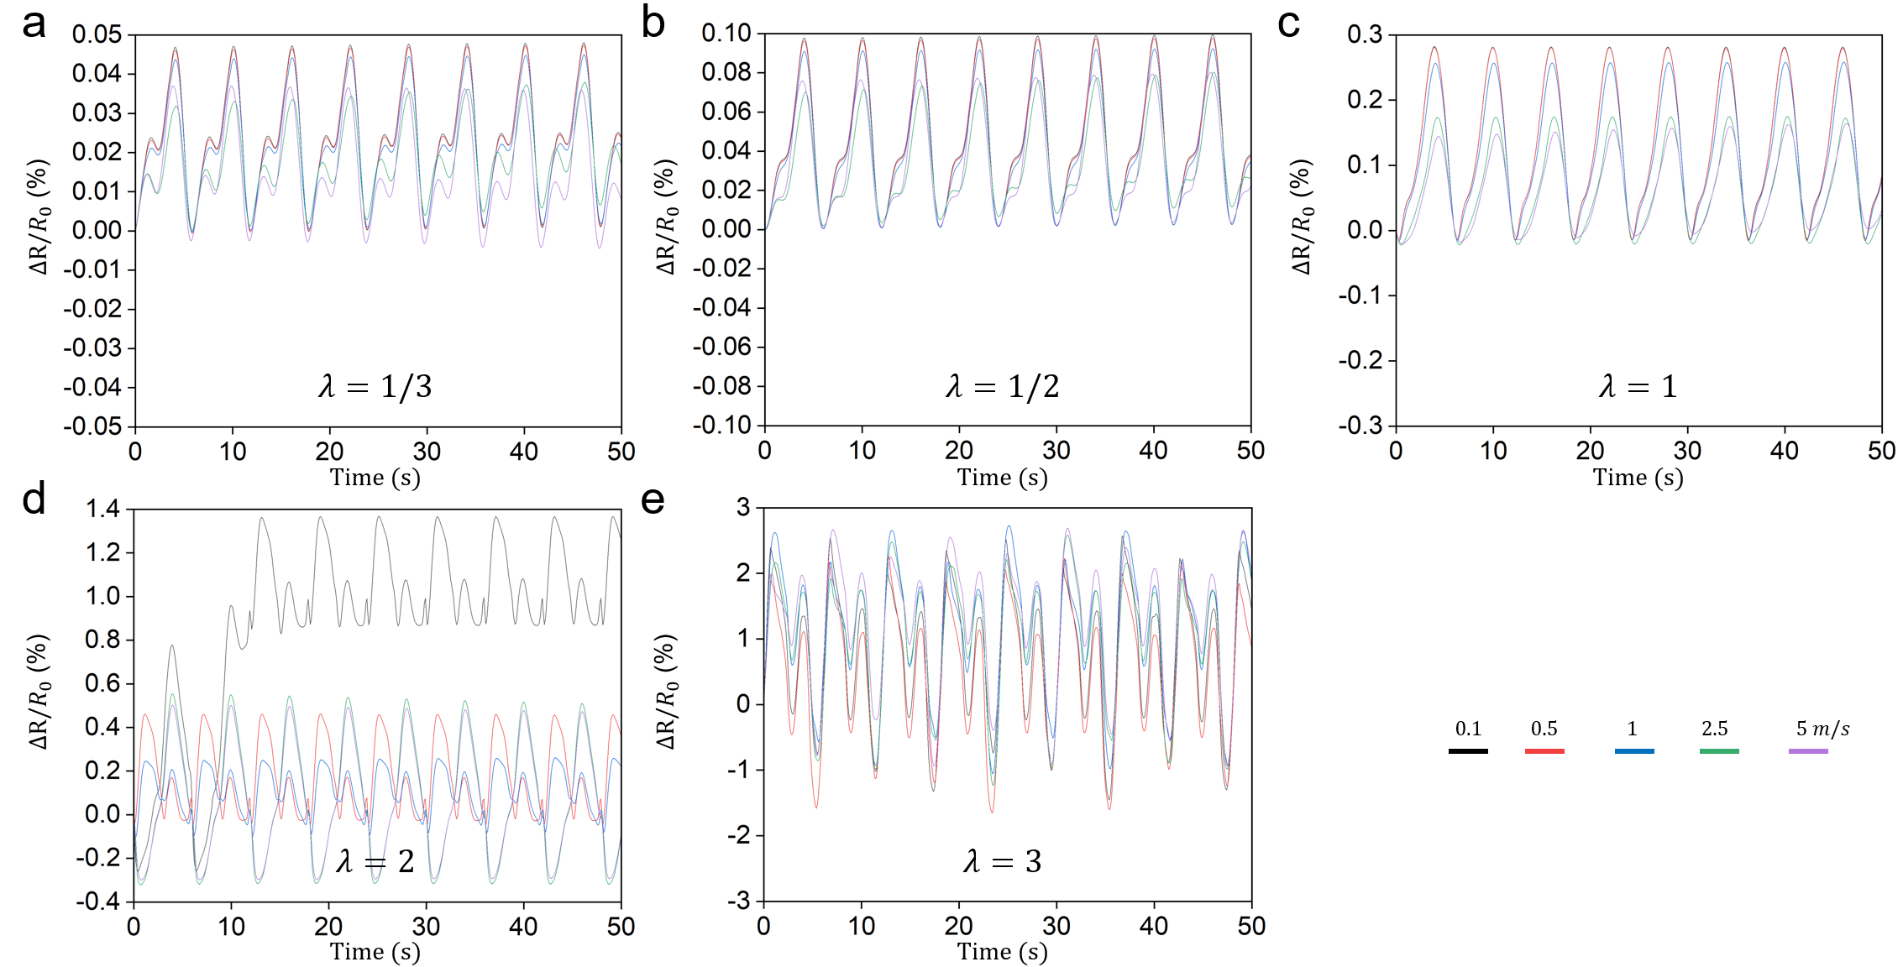


Figure S21. The impact of the of LM and the on the strength of the electrical signal with the is 20o.

The simulation results indicate that when *θ* is 35 degrees, the intensity of electrical signal variation generally increases with the enlargement of the scaling factor *λ*. As *λ* gradually increases from 1/3 to 3, the intensity of electrical signal variation increases by two orders of magnitude. This suggests that the anisotropic structures inside the microchannel are the primary factor influencing the intensity of electrical signal variation. Additionally, beyond a *λ* value of 3, the resistance signal no longer exhibits a sinusoidal trend with the increasing injection velocity of the LM. This indicates that when the dimensions of the microstructures become too large, capillary action within the microstructural valley fails to effectively restrain the deformation of the LM.

From the above figures, it can be seen that, at different , the increase in and has a similar trend in influencing the electrical signal strength. With the increase in , the electrical signal strength gradually increases, while with the increase in , it exhibits a trend of either initially increasing and then decreasing or initially decreasing and then increasing. Furthermore, with the increase in *λ* and *v*, the electrical signal gradually exhibits irregular variations.


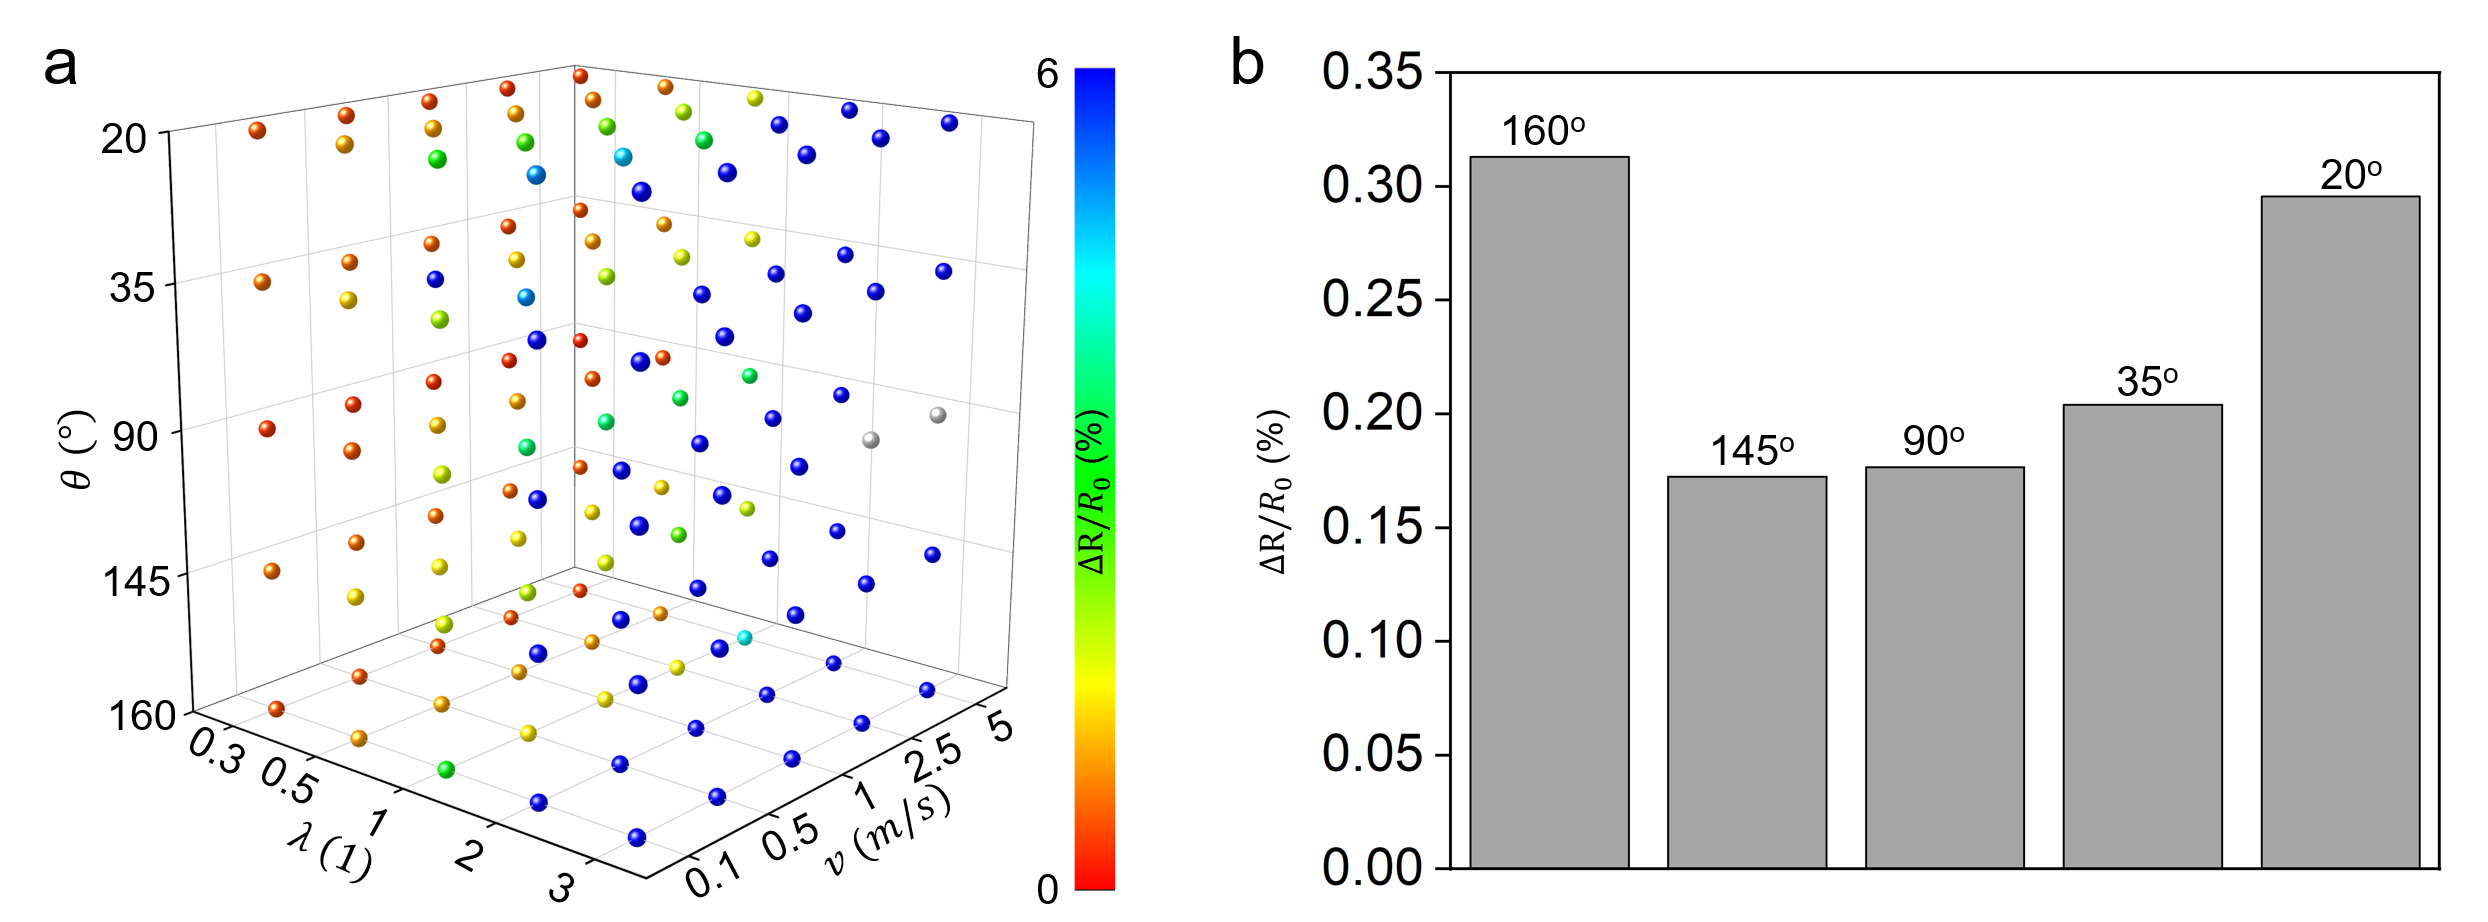


Figure S22. **a**, The simulation summary of the influence of , , and on the electrical signal strength. **b**, The impact of on the electrical signal strength with , .

From the above figure, it can be observed that during the process of reducing the from 160° to 20°, the electrical signal variation intensity shows a trend of decreasing first and then increasing. This indicates that also has a significant impact on the electrical signal variation intensity. The greater the of tilt of the anisotropic structure, the more pronounced the enhancement effect on the range of electrical signal variation.


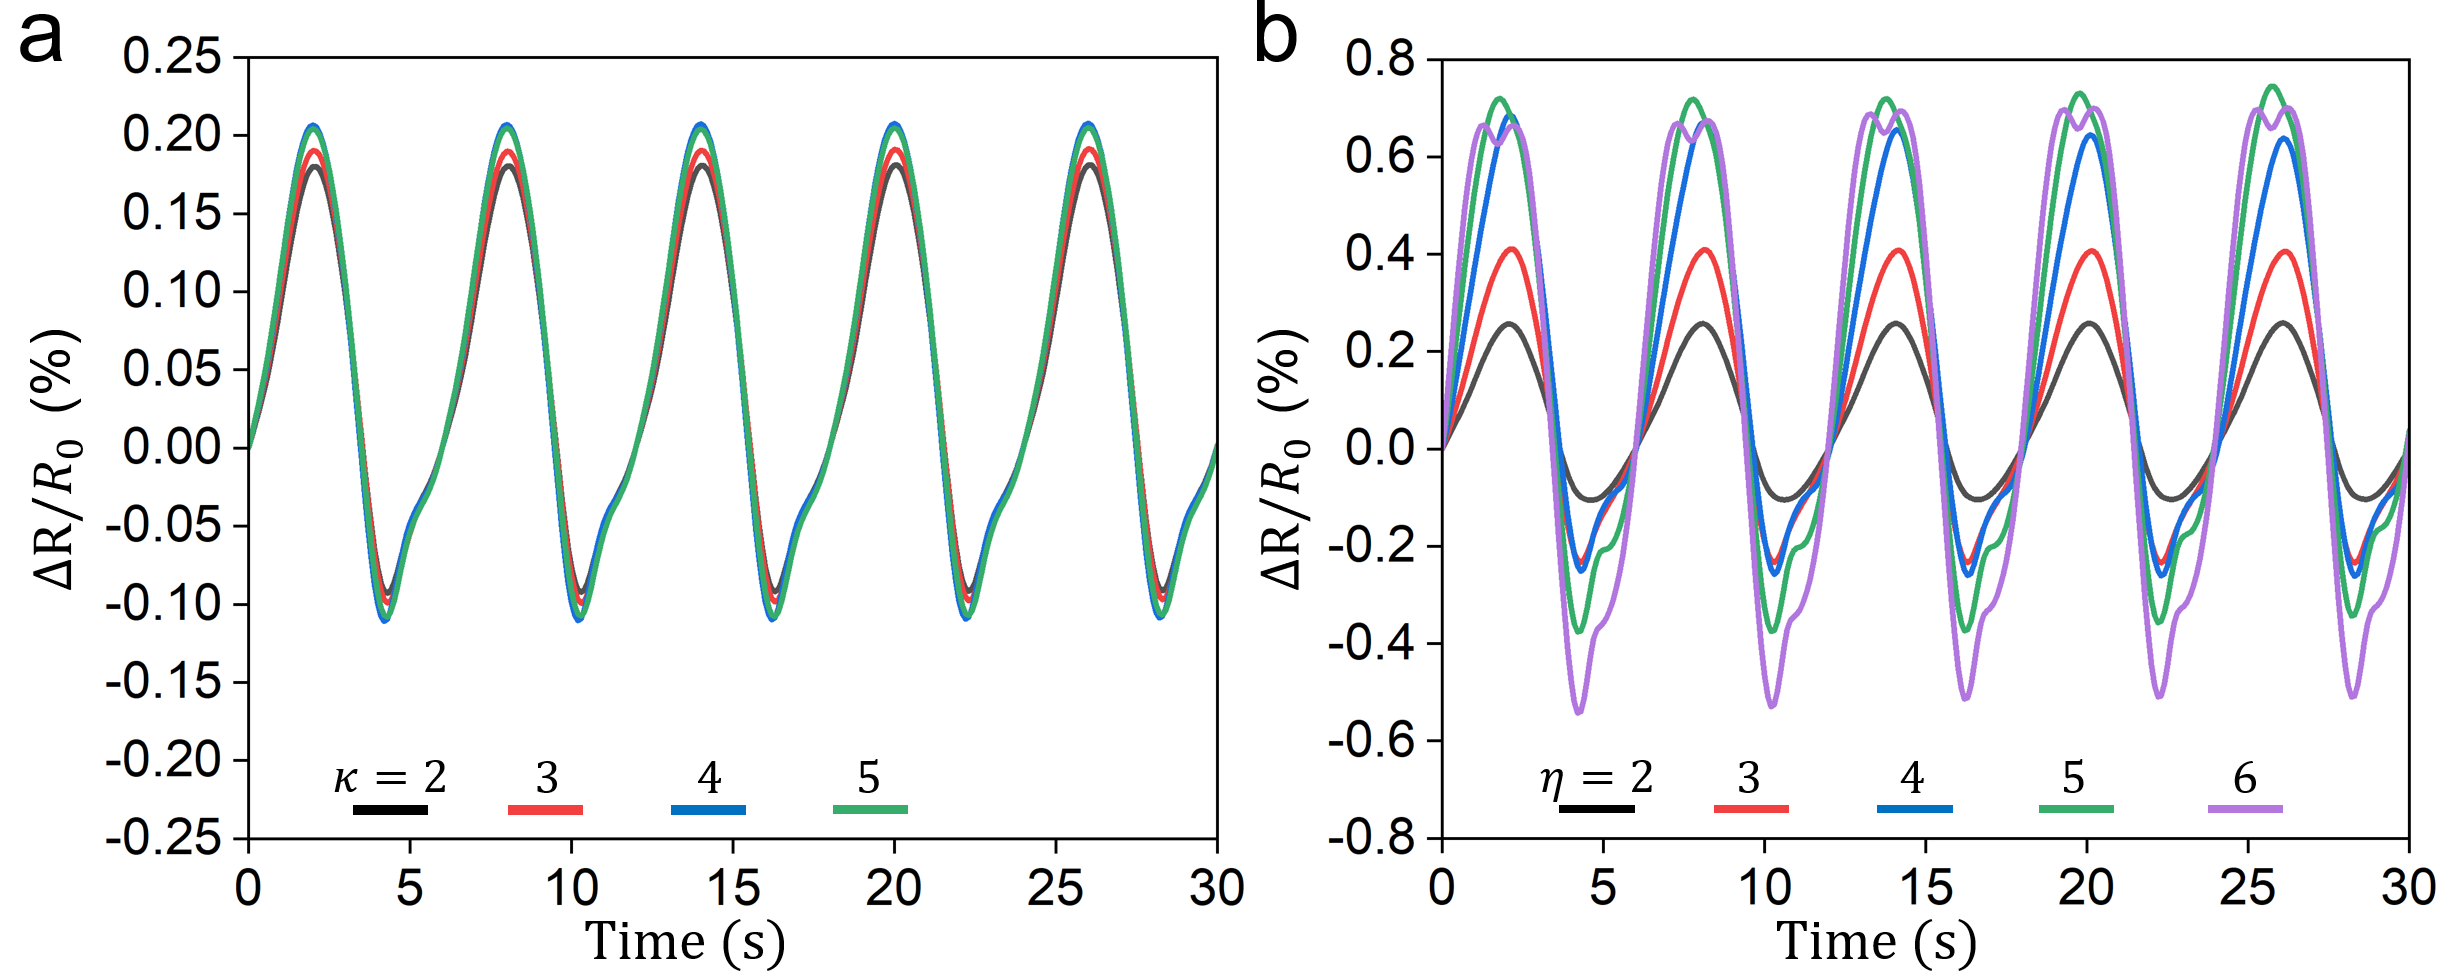


Figure S23. **a**, The impact of on the electrical signal strength. **b**, The impact of on the electrical signal strength.

The simulation results indicate that an increase in within a certain range contributes to an increase in the electrical signal intensity. Additionally, an increase in the also has a significant impact on the electrical signal intensity.


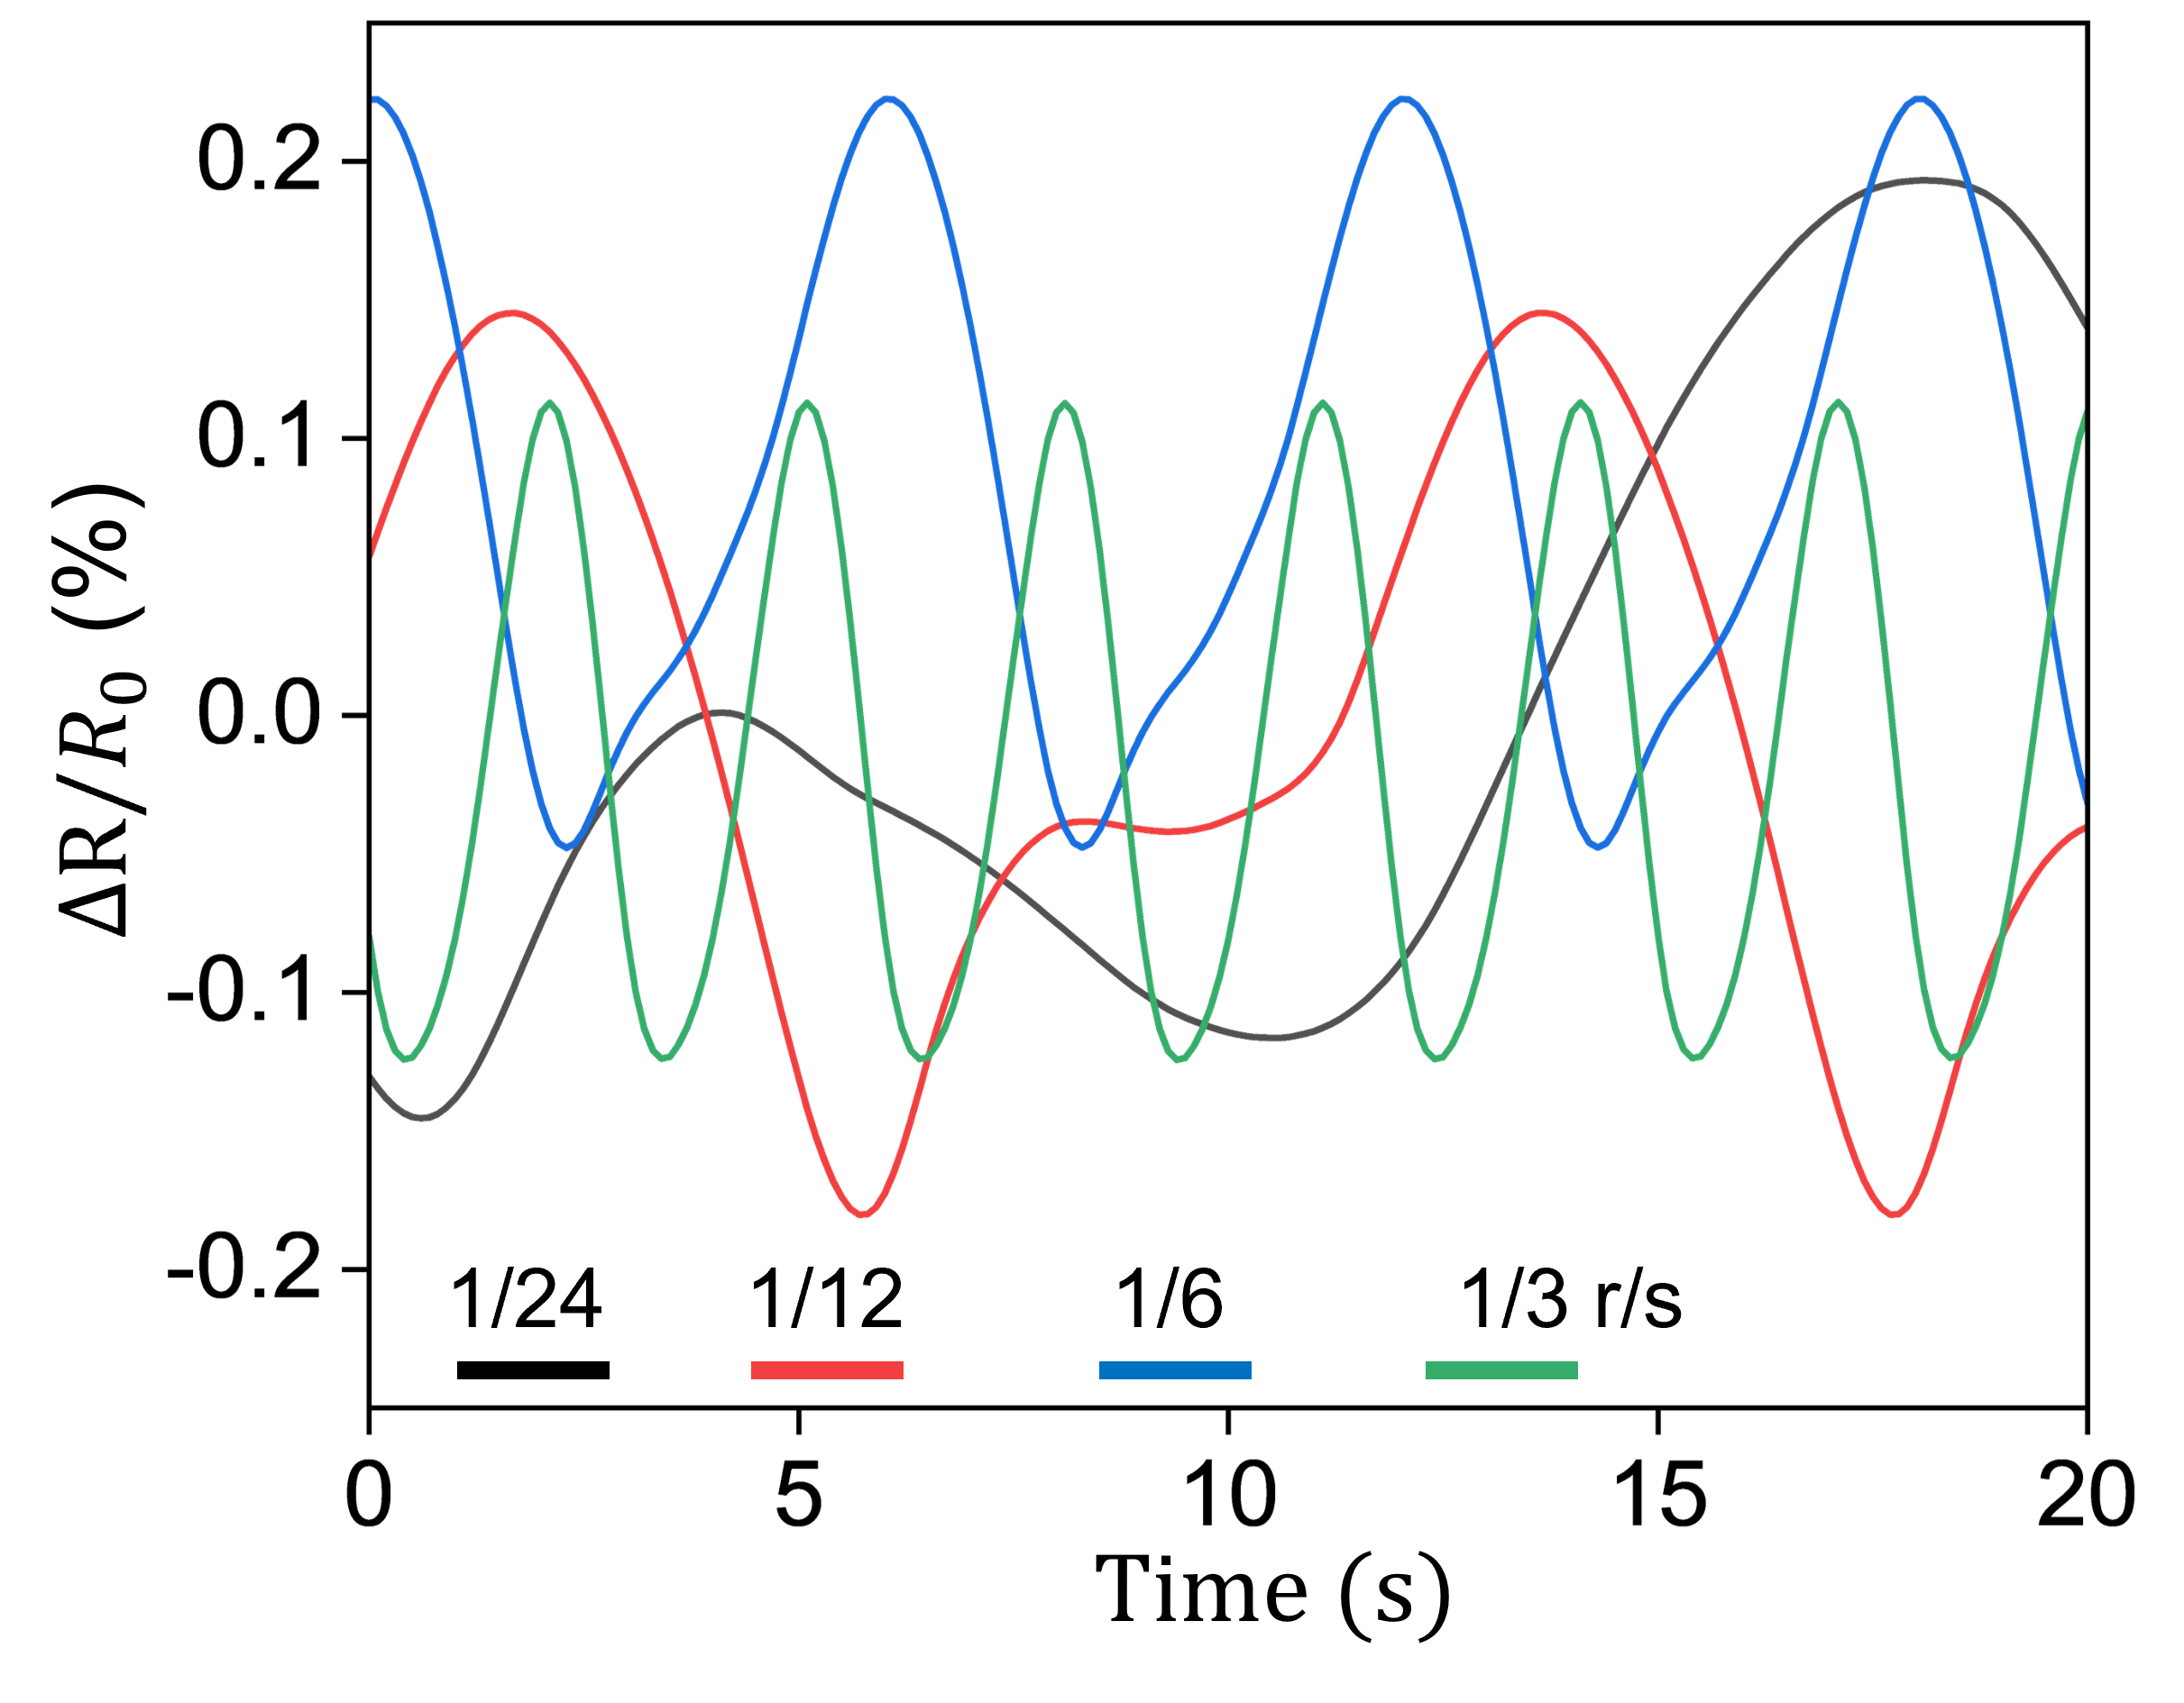


Figure S24. The impact of on the electrical signal strength.

The intensity of electrical signal variation in LMT gradually diminishes as the rotational speed escalates from 1/24 *r/s* to 1/3 *r/s*. This phenomenon is primarily attributed to the fact that, despite LMT's rapid response characteristic of 0.11 s, an elevation in rotational speed inevitably leads to partial signal loss.
